# Supplementary material
Source: PubMed Central journal article supplement (PMC3359698)
Supplement: NIHMS345448-supplement-1_si_001.pdf [file NIHMS345448-supplement-1_si_001.pdf]

# Organocatalysis in Water at Room Temperature with *In-Flask* Catalyst Recycling

Bruce H. Lipshutz,\* Subir Ghorai

*Department of Chemistry & Biochemistry  
University of California, Santa Barbara, California 93106*

lipshutz@chem.ucsb.edu

## Supporting Information

### Table of Contents

|      |                                                                                                                           |         |
|------|---------------------------------------------------------------------------------------------------------------------------|---------|
| I.   | General Information                                                                                                       | S2      |
| II.  | Preparation and characterizations of catalyst <b>2</b> and <b>6</b>                                                       | S2-S5   |
| III. | Preparation and characterizations of all aldol products                                                                   | S5-S10  |
| IV.  | Spectral copy ( <sup>1</sup> H and <sup>13</sup> C) of all new and ( <sup>1</sup> H) of all known compounds and HPLC data | S11-S49 |

**General Information:** All reactions were performed either in a round bottom flask or screw cap glass vials containing a Teflon coated stir bar and septum. Column chromatography was performed using 60 Å flash silica gel. Thin-Layer-Chromatography analysis was conducted using commercially available silica gel 60 F<sub>254</sub> plates. Nuclear Magnetic Resonance spectra were obtained in CDCl<sub>3</sub>, with proton and carbon resonances at 400 and 100 MHz, respectively, and are referenced to the residual solvent signal at 7.27 ppm for <sup>1</sup>H and δ 77.23 ppm for <sup>13</sup>C. Data for <sup>1</sup>H are reported as follows: chemical shift (δ ppm), multiplicity (s = singlet, d = doublet, t = triplet, q = quartet, m = multiplet, sep = septet), coupling constant and integration. Data for <sup>13</sup>C NMR are reported in terms of chemical shift. Infrared spectra were obtained either neat or by thin-film on NaCl plates and are reported as cm<sup>-1</sup>. All commercially available reagents were used without further purification.

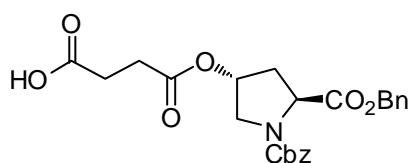

**4-(((2S,4R)-1,2-bis((benzyloxy)carbonyl)pyrrolidin-4-yl)oxy)-4-oxobutanoic acid (4).** To a solution of (2S,4R)-dibenzyl 4-hydroxypyrrolidine-1,2-dicarboxylate (**3**)<sup>1</sup> (1.00 g, 2.82 mmol) and succinic anhydride (0.70 g, 7.00 mmol) in pyridine (12 mL), DMAP

(0.069 g, 0.56 mmol) was added and the stirring was continued at 22 °C for 12 h. The reaction mixture was added to 1(N) HCl (100 mL) and extracted with CH<sub>2</sub>Cl<sub>2</sub>. The combined organic layers were washed with 1(N) HCl (3 x 50 mL), water (2 x 30 mL), dried over Na<sub>2</sub>SO<sub>4</sub> and concentrated *in vacuo* affording a pale yellow liquid, which was purified by flash column chromatography on silica gel eluting with 40% EtOAc/hexane afforded the title compound **4** (1.25 g, 98%) as a colorless liquid. IR (neat): 3498, 3065, 3034, 2954, 1739, 1712, 1498, 1455, 1420, 1355, 1266, 1167, 1128, 1067, 1004, 741 cm<sup>-1</sup>; <sup>1</sup>H NMR (400 MHz, CDCl<sub>3</sub>): δ 7.36-7.19 (m, 10H), 5.34-5.28 (m, 1H), 5.24 (d, *J* = 12.4 Hz, 0.5H), 5.17 (d, *J* = 12.4 Hz, 0.5H), 5.167 (s, 1H), 5.06 (s, 1H), 5.00 (s, 1H), 4.55 (t, *J* = 8.0 Hz, 0.5H), 4.48 (t, *J* = 8.0 Hz, 0.5H), 3.79-3.67 (m, 2H), 2.67-2.56 (m, 4H), 2.47-2.40 (m, 1H), 2.26-2.16 (m, 1H); <sup>13</sup>C NMR (100 MHz, CDCl<sub>3</sub>): δ 177.3, 172.2, 172.0, 171.71, 171.67, 155.0, 154.4, 136.4, 136.2, 135.5, 135.3, 128.8, 128.7, 128.6, 128.5, 128.4, 128.3, 128.2, 128.1, 73.2, 72.4, 67.6, 67.3, 67.2, 58.1, 57.9, 52.7, 52.3, 36.7, 35.6, 29.0, 28.9, 28.8; MS (ESI): *m/z* 478 (M + Na); HRMS (ESI) calcd for C<sub>24</sub>H<sub>25</sub>NO<sub>8</sub>Na [M + Na]<sup>+</sup> = 478.1478, found 478.1458.

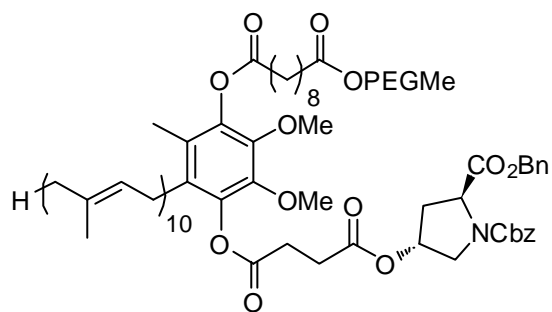

**Compound 5 (precursor to catalyst 2).** PQS<sup>2</sup> (**1**) (1.9 g, 0.63 mmol) and 4-(((2*S*,4*R*)-1,2-bis((benzyloxy)carbonyl)pyrrolidin-4-yl)oxy)-4-oxobutanoic acid (**4**) (0.43 g, 0.94 mmol) were dissolved in CH<sub>2</sub>Cl<sub>2</sub> (10 mL) and cooled to 0 °C. 1-(3-dimethylaminopropyl)-3-ethyl carbodiimide (EDC) (0.24 g, 1.25 mmol), and DMAP (0.03 g, 0.24 mmol) were then directly added in succession to

the mixture as solids. Et<sub>3</sub>N (0.19 mL, 1.36 mmol) was added through a syringe. The resulting mixture was stirred at 22 °C for 20 h. Water was added to the reaction mixture and extracted with CH<sub>2</sub>Cl<sub>2</sub>. The combined organic layers were washed with saturated NaHCO<sub>3</sub>, water, brine, dried and concentrated *in vacuo* affording a colorless liquid, which was purified by flash column chromatography on silica gel, eluting with EtOAc, followed by CH<sub>2</sub>Cl<sub>2</sub> to 8% MeOH/CH<sub>2</sub>Cl<sub>2</sub> gradient afforded the compound **5** (1.85 g, 96%) as a white foam. IR (neat): 2954, 2858, 1740, 1714, 1644, 1455, 1417, 1350, 1325, 1291, 1250, 1100, 950, 914, 849, 731 cm<sup>-1</sup>; <sup>1</sup>H NMR (400 MHz, CDCl<sub>3</sub>): δ 7.36-7.21 (m, 10H), 5.34-5.28 (m, 1H), 5.24 (d, *J* = 12.0 Hz, 0.5H), 5.18-4.96 (m, 13.5H), 4.55 (t, *J* = 8.0 Hz, 0.5H), 4.48 (t, *J* = 8.0 Hz, 0.5H), 4.24-4.22 (m, 2H), 3.85-3.69 (m, 8H), 3.68-3.46 (m, PEG), 3.39 (s, 3H), 3.20-3.16 (m, 2H), 2.94-2.89 (m, 2H), 2.74-2.69 (m, 2H), 2.63-2.55 (m, 4H), 2.45-2.41 (m, 1H), 2.34 (t, *J* = 7.6 Hz, 2H), 2.22-2.14 (m, 1H), 2.09-1.98 (m, 39H), 1.78-1.68 (m, 8H), 1.63-1.57 (m, 29H), 1.42-1.33 (m, 8H); <sup>13</sup>C NMR (100 MHz, CDCl<sub>3</sub>): δ 173.1, 171.5, 171.3, 171.0, 169.8, 154.2, 153.6, 143.1, 143.0, 142.9, 142.8, 140.4, 140.0, 139.7, 135.9, 135.8, 135.2, 135.1, 134.9, 134.5, 134.3, 130.6, 128.2, 128.1, 128.0, 127.9, 127.8, 127.6, 127.4, 124.5, 124.0, 123.9, 123.6, 120.9, 72.6, 71.9, 71.5, 70.2, 69.6, 68.7, 66.8, 66.5, 66.4, 62.9, 60.2, 60.1, 58.6, 57.6, 57.2, 52.1, 51.7, 39.3, 39.2, 36.1, 35.0, 33.7, 33.5, 28.7, 28.6, 28.2, 26.3, 26.2, 25.8, 25.4, 24.6, 24.4, 17.3, 15.9, 15.6, 11.7; MS (ESI): *m/z* ~ 1198 (M + 3Na)<sup>+3</sup>.

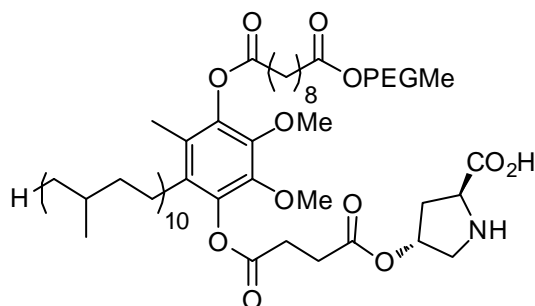

**Catalyst 2.** A well-stirred suspension of compound **5** (1.61 g) and Pd/C (10% w/w, 160 mg) in dry MeOH (20 mL) was fitted to a source of hydrogen (1 atm) and stirred at 22 °C for 12 h. The mixture was filtered through a pad of celite and washed with MeOH. The combined filtrates were concentrated *in vacuo* afforded the compound **2** (1.47 g, 98%) as a white waxy solid. IR

(neat): 3532, 2871, 1759, 1737, 1601, 1466, 1376, 1345, 1280, 1243, 1112, 1062, 949, 843 cm<sup>-1</sup>; <sup>1</sup>H NMR (400 MHz, CDCl<sub>3</sub>): δ 5.32 (br s, 1H), 4.23-4.21 (m, 2H), 3.84-3.69 (m, 8H), 3.68-3.45 (m, PEG), 3.38 (s, 3H), 2.94-2.72 (m, 4H), 2.60-2.54 (m, 2H), 2.48-2.38 (m, 2H), 2.33 (t, *J* = 7.6 Hz, 2H), 2.05 (br s, 3H),

1.79-1.72 (m, 2H), 1.65-1.59 (m, 2H), 1.55-1.49 (m, 2H), 1.38-1.04 (m, 74H), 0.96-0.83 (m, 33H); <sup>13</sup>C NMR (100 MHz, CDCl<sub>3</sub>): δ 173.0, 171.15, 171.1, 170.9, 170.0, 142.7, 140.4, 139.9, 139.6, 129.2, 123.8, 71.5, 70.1, 69.7, 68.7, 62.8, 60.1, 58.5, 38.9, 37.0, 36.92, 36.89, 36.8, 36.6, 33.6, 32.3, 32.2, 28.6, 27.5, 24.6, 24.4, 24.3, 24.0, 22.3, 22.2, 19.44, 19.37, 19.31, 11.5; MS (ESI): *m/z* ~ 1124 (M + 3Na)<sup>+3</sup>.

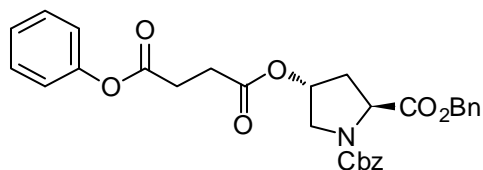

**(2*S*,4*R*)-dibenzyl 4-((4-oxo-4-phenoxybutanoyl)oxy)pyrrolidine-1,2-dicarboxylate (precursor to catalyst **6**).** Phenol (9.4 mg, 0.10 mmol) and 4-(((2*S*,4*R*)-1,2-bis((benzyloxy)carbonyl) pyrrolidin-4-yl)oxy)-4-oxobutanoic acid (**4**) (55 mg, 0.12 mmol) were dissolved in CH<sub>2</sub>Cl<sub>2</sub> (1.5 mL) and cooled to 0 °C. 1-(3-dimethylaminopropyl)-3-ethyl carbodiimide (EDC) (38 mg, 0.2 mmol), and DMAP (5.5 mg, 0.045 mmol) were then directly added in succession to the mixture as solids. Et<sub>3</sub>N (31 μL, 0.22 mmol) was added through a syringe. The resulting mixture was stirred at 22 °C for 12 h. Water was added to the reaction mixture and extracted with CH<sub>2</sub>Cl<sub>2</sub>. The combined organic layers were washed with saturated NaHCO<sub>3</sub>, water, brine, dried and concentrated *in vacuo* affording a colorless liquid, which was purified by flash column chromatography on silica gel, eluting with 15% EtOAc/hexane afforded the title compound (52 mg, 98%) as a colorless liquid. [α]<sub>D</sub><sup>20</sup> = -38.2 (c = 1.60, CHCl<sub>3</sub>); IR (neat): 3064, 3033, 2950, 2887, 1736, 1708, 1592, 1493, 1420, 1354, 1263, 1164, 1069, 1005, 918, 882, 816, 754 cm<sup>-1</sup>; <sup>1</sup>H NMR (400 MHz, CDCl<sub>3</sub>): δ 7.39-7.28 (m, 11H), 7.23 (td, *J* = 7.6, 1.2 Hz, 2H), 7.10 (dt, *J* = 7.6, 1.2 Hz, 2H), 5.38-5.33 (m, 1H), 5.26 (d, *J* = 12.4 Hz, 0.5H), 5.18 (d, *J* = 12.4 Hz, 0.5H), 5.16 (s, 1H), 5.07 (s, 1H), 5.01 (s, 1H), 5.58 (t, *J* = 8.0 Hz, 0.5H), 4.50 (t, *J* = 8.0 Hz, 0.5H), 3.83-3.78 (m, 1.5H), 3.71 (d, *J* = 12.4 Hz, 0.5H), 2.94-2.86 (m, 2H), 2.75-2.70 (m, 2H), 2.50-2.42 (m, 1H), 2.28-2.19 (m, 1H); <sup>13</sup>C NMR (100 MHz, CDCl<sub>3</sub>): δ 172.1, 171.6, 171.5, 170.8, 154.9, 154.3, 150.7, 136.5, 136.4, 135.6, 135.4, 129.6, 128.7, 128.65, 128.6, 128.5, 128.3, 128.25, 128.2, 128.0, 126.0, 121.5, 73.2, 72.5, 67.5, 67.2, 67.1, 58.2, 57.9, 52.7, 52.3, 36.8, 35.7, 29.3, 29.26; MS (ESI): *m/z* 554 (M + Na), 570 (M + K); HRMS (ESI) calcd for C<sub>30</sub>H<sub>29</sub>NO<sub>8</sub>Na [M + Na]<sup>+</sup> = 554.1791, found 554.1778.

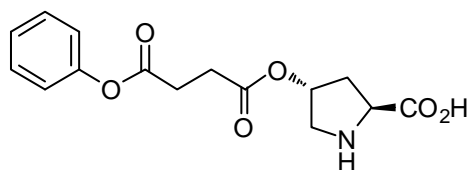

**Catalyst 6.** A well-stirred suspension of (2*S*,4*R*)-dibenzyl 4-((4-oxo-4-phenoxybutanoyl)oxy)pyrrolidine-1,2-dicarboxylate (45 mg) and Pd/C (10% w/w, 5 mg) in dry MeOH (1 mL) was fitted to a source of hydrogen (1 atm) and stirred at 22 °C for 12 h. The mixture was filtered through a pad of celite and washed with MeOH. The combined filtrates were concentrated *in vacuo* affording the compound **6** (26 mg, 99%) as a colorless liquid. IR (neat): 3536, 2852, 1758, 1739, 1600, 1458, 1353, 1300, 1256, 1104, 954, 849 cm<sup>-1</sup>; <sup>1</sup>H NMR (400 MHz, CDCl<sub>3</sub>): δ 7.36 (t, *J*

h. The mixture was filtered through a pad of celite and washed with MeOH. The combined filtrates were concentrated *in vacuo* affording the compound **6** (26 mg, 99%) as a colorless liquid. IR (neat): 3536, 2852, 1758, 1739, 1600, 1458, 1353, 1300, 1256, 1104, 954, 849 cm<sup>-1</sup>; <sup>1</sup>H NMR (400 MHz, CDCl<sub>3</sub>): δ 7.36 (t, *J*

= 7.2 Hz, 2H), 7.21 (t,  $J = 7.2$  Hz, 1H), 7.07 (d,  $J = 7.2$  Hz, 2H), 5.29 (br s, 1H), 4.02 (br s, 1H), 3.60 (br s, 1H), 3.15 (br s, 1H), 2.82 (br s, 2H), 2.67 (br s, 2H), 2.28 (br s, 2H); MS (ESI):  $m/z$  330 (M + Na); HRMS (ESI) calcd for  $C_{15}H_{17}NO_6Na$  [M + Na] $^+$  = 330.0954, found 330.0952.

**General procedure for the asymmetric direct aldol reaction using the catalyst 2 in water.** Aromatic aldehyde **7** (0.10 mmol), ketone **8** (0.50 mmol) and catalyst **2** (33 mg, 0.01 mmol) were sequentially added into a Teflon-coated-stir-bar-containing glass vial at room temperature. H<sub>2</sub>O (0.25 mL) was added and the resulting solution was allowed to stir at room temperature for 18-48 hours. The homogeneous reaction mixture was then diluted with EtOAc (1 mL), filtered through a bed of silica gel layered over Celite, and the bed further washed (3 x 4 mL) with EtOAc to collect all of the aldol product material. The volatiles were removed *in vacuo* to afford the crude product which was subsequently purified by flash chromatography on silica gel (solvent noted) to afford the title compounds.

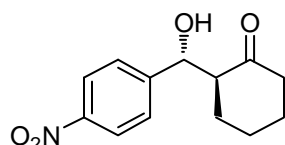

**(2S,1'R)-2-[1'-Hydroxy-1'-(4-nitrophenyl)methyl]cyclohexanone [(2S,1'R)-**9**].**<sup>3</sup> The representative procedure was followed using 4-nitrobenzaldehyde (15 mg, 0.10 mmol), cyclohexanone (52  $\mu$ L, 0.50 mmol) and catalyst **2** (33 mg, 0.01 mmol). Column chromatography on silica gel (eluting with 20% EtOAc/hexanes) afforded the product as a white solid (23 mg, 93%). Enantiomeric excess: 96%, determined by HPLC (Daicel Chiralpak AD, *i*PrOH/hexane = 20:80),  $\lambda = 254$  nm, flow rate 0.5 mL/min,  $t_{R\text{minor}} = 24.172$  min,  $t_{R\text{major}} = 31.140$  min; Data for the *anti* isomer (2S,1'R):  $^1\text{H NMR}$  (400 MHz,  $\text{CDCl}_3$ ):  $\delta$  8.21 (d,  $J = 8.8$  Hz, 2H), 7.51 (d,  $J = 8.8$  Hz, 2H), 4.90 (dd,  $J = 8.4, 3.2$  Hz, 1H), 4.09 (d,  $J = 3.2$  Hz, 1H), 2.63-2.56 (m, 1H), 2.54-2.48 (m, 1H), 2.42-2.33 (m, 1H), 2.16-2.10 (m, 1H), 1.86-1.82 (m, 1H), 1.73-1.66 (m, 1H), 1.64-1.52 (m, 2H), 1.44-1.37 (m, 1H).

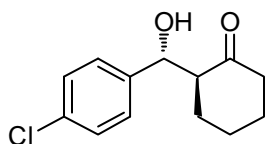

**(2S,1'R)-2-[1'-Hydroxy-1'-(4-chlorophenyl)methyl]cyclohexanone [(2S,1'R)-**9a**].**<sup>3</sup> The representative procedure was followed using 4-chlorobenzaldehyde (14 mg, 0.10 mmol), cyclohexanone (52  $\mu$ L, 0.50 mmol) and catalyst **2** (33 mg, 0.01 mmol). Column chromatography on silica gel (eluting with 20% EtOAc/hexanes) afforded the product as a colorless oil (21 mg, 88%). Enantiomeric excess: 90%, determined by HPLC (Daicel Chiralpak AD, *i*PrOH/hexane = 10:90),  $\lambda = 254$  nm, flow rate 0.5 mL/min,  $t_{R\text{minor}} = 27.468$  min,  $t_{R\text{major}} = 32.012$  min; Data for the *anti* isomer (2S,1'R)-**9a**:  $^1\text{H NMR}$  (400 MHz,  $\text{CDCl}_3$ ):  $\delta$  7.30 (d,  $J = 8.4$  Hz, 2H), 7.24 (d,  $J = 8.4$  Hz, 2H), 4.74 (dd,  $J = 8.8, 2.4$  Hz, 1H), 3.97 (d,  $J = 2.4$  Hz, 1H), 2.58-2.44 (m, 2H), 2.38-2.28 (m, 1H), 2.09-2.05 (m, 1H), 1.80-1.76 (m, 1H), 1.66-1.50 (m, 3H), 1.29-1.25 (m, 1H).

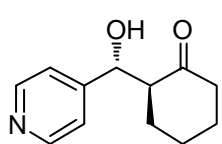

**(2S,1'R)-2-[1'-Hydroxy-1'-(4-pyridyl)methyl]cyclohexanone [(2S,1'R)-9b].<sup>4</sup>**

The representative procedure was followed using 4-pyridinecarboxaldehyde (9.4  $\mu$ L, 0.10 mmol), cyclohexanone (52  $\mu$ L, 0.50 mmol) and catalyst **2** (33 mg, 0.01 mmol). Column chromatography on silica gel (eluting with 75% EtOAc/hexanes) afforded the product as a white solid (18 mg, 90%). Enantiomeric excess: 90%, determined by HPLC (Daicel Chiralpak AD, *i*PrOH/hexane = 10:90),  $\lambda$  = 254 nm, flow rate 0.5 mL/min,  $t_{R\text{minor}}$  = 52.096 min,  $t_{R\text{major}}$  = 54.132 min; Data for the *anti* isomer (2S,1'R)-**9b**: <sup>1</sup>H NMR (400 MHz, CDCl<sub>3</sub>):  $\delta$  8.59 (d,  $J$  = 6.0 Hz, 2H), 7.26 (d,  $J$  = 6.0 Hz, 2H), 4.78 (dd,  $J$  = 8.4, 3.2 Hz, 1H), 4.02 (d,  $J$  = 3.2 Hz, 1H), 2.63-2.56 (m, 1H), 2.52-2.47 (m, 1H), 2.37 (tdd,  $J$  = 13.2, 6.0, 1.2 Hz, 1H), 2.16-2.09 (m, 1H), 1.87-1.82 (m, 1H), 1.74-1.52 (m, 3H), 1.46-1.35 (m, 1H).

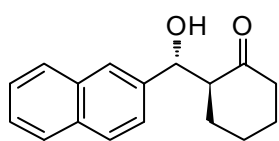

**(2S,1'R)-2-[1'-Hydroxy-1'-(2-naphthyl)methyl]cyclohexanone [(2S,1'R)-9c].<sup>4</sup>**

The representative procedure was followed using 2-naphthaldehyde (15.6 mg, 0.10 mmol), cyclohexanone (52  $\mu$ L, 0.50 mmol) and catalyst **2** (33 mg, 0.01 mmol). Column chromatography on silica gel (eluting with 20% EtOAc/hexanes) afforded the product as a white solid (19 mg, 74%). Enantiomeric excess: 92%, determined by HPLC (Daicel Chiralpak AD, *i*PrOH/hexane = 5:95),  $\lambda$  = 254 nm, flow rate 0.5 mL/min,  $t_{R\text{minor}}$  = 93.228 min,  $t_{R\text{major}}$  = 96.688 min; Data for the *anti* isomer (2S,1'R)-**9c**: <sup>1</sup>H NMR (400 MHz, CDCl<sub>3</sub>):  $\delta$  7.87-7.83 (m, 3H), 7.76 (s, 1H), 7.50-7.47 (m, 3H), 4.98 (dd,  $J$  = 8.8, 2.4 Hz, 1H), 4.07 (d,  $J$  = 2.4 Hz, 1H), 2.76-2.69 (m, 1H), 2.55-2.49 (m, 1H), 2.40 (tdd,  $J$  = 13.2, 6.0, 1.2 Hz, 1H), 2.14-2.06 (m, 1H), 1.80-1.73 (m, 1H), 1.71-1.48 (m, 3H), 1.40-1.30 (m, 1H).

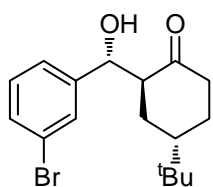

**(2S,4S,1'R)-4-tert-butyl-2-[1'-Hydroxy-1'-(3-bromophenyl)methyl]cyclohexanone**

**[(2S,4S,1'R)-9d].**

The representative procedure was followed using 3-bromobenzaldehyde (18.5 mg, 0.10 mmol), 4-*tert*-butylcyclohexanone (77 mg, 0.50 mmol) and catalyst **2** (33 mg, 0.01 mmol). Column chromatography on silica gel (eluting with 20% EtOAc/hexanes) afforded the product as a white solid (27 mg, 80%). Enantiomeric excess: 91%, determined by HPLC (Daicel Chiralpak AD, *i*PrOH/hexane = 10:90),  $\lambda$  = 254 nm, flow rate 0.5 mL/min,  $t_{R\text{minor}}$  = 15.520 min,  $t_{R\text{major}}$  = 71.464 min; Data for the *anti* isomer (2S,4S,1'R)-**9d**:  $[\alpha]_D^{20}$  = -61.6 (c = 1.00, CHCl<sub>3</sub>); m.p.: 119-123 °C; IR (thin film): 3375, 2955, 2868, 1694, 1595, 1571, 1469, 1434, 1365, 1334, 1226, 1155, 1097, 1071, 1052, 793 cm<sup>-1</sup>; <sup>1</sup>H NMR (400 MHz, CDCl<sub>3</sub>):  $\delta$  7.53 (t,  $J$  = 1.6 Hz, 1H), 7.46 (dt,  $J$  = 7.6, 1.6 Hz, 1H), 7.29 (dt,  $J$  = 7.6, 1.6 Hz, 1H), 7.47 (t,  $J$  = 7.6 Hz, 1H), 4.86 (d,  $J$  = 9.6 Hz, 1H), 2.63 (dt,  $J$  = 9.2, 6.8 Hz, 1H), 2.54-2.42 (m, 2H), 2.03-1.99 (m, 1H), 1.63-1.50 (m, 2H), 1.49-1.36 (m, 2H), 0.80 (s, 9H); <sup>13</sup>C NMR (100 MHz, CDCl<sub>3</sub>):  $\delta$  215.9, 143.9, 131.5, 130.3, 130.2, 125.7,

122.9, 74.4, 55.4, 42.4, 39.4, 33.0, 27.8, 27.3, 25.4; MS (ESI):  $m/z$  361 ( $M + Na$ ), 363 ( $M + 2 + Na$ ); HRMS (ESI) calcd for  $C_{17}H_{23}O_2BrNa$  [ $M + Na$ ] $^+$  = 361.0779, found 361.0776.

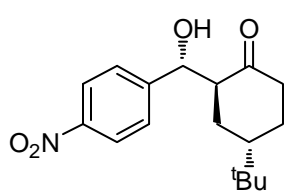

**(2S,4S,1'R)-4-tert-Butyl-2-[1'-Hydroxy-1'-(4-nitrophenyl)methyl]cyclohexanone [(2S,4S,1'R)-9e].**<sup>5</sup> The representative procedure was followed using 4-nitrobenzaldehyde (15 mg, 0.10 mmol), 4-tert-butylcyclohexanone (77 mg, 0.50 mmol) and catalyst **2** (33 mg, 0.01 mmol). Column chromatography on silica gel (eluting with 30% EtOAc/hexanes) afforded the product as a white solid (26 mg, 85%). Enantiomeric

excess: 79%, determined by HPLC (Daicel Chiralpak AD, *i*PrOH/hexane = 20:80),  $\lambda$  = 254 nm, flow rate 0.5 mL/min,  $t_{R\text{minor}}$  = 16.896 min,  $t_{R\text{major}}$  = 30.708 min; Data for the *anti* isomer (2S,4S,1'R)-**9e**:  $^1H$  NMR (400 MHz,  $CDCl_3$ ):  $\delta$  8.25 (d,  $J$  = 8.4 Hz, 2H), 7.55 (d,  $J$  = 8.4 Hz, 2H), 4.97 (dd,  $J$  = 8.8, 2.8 Hz, 1H), 3.63 (d,  $J$  = 2.8 Hz, 1H), 2.67 (dt,  $J$  = 8.8, 7.2 Hz, 1H), 2.57-2.51 (m, 1H), 2.47-2.38 (m, 1H), 1.99-1.96 (m, 1H), 1.62-1.38 (m, 4H), 0.79 (s, 9H).

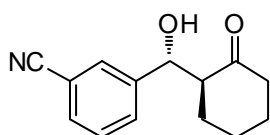

**(2S,1'R)-2-[1'-Hydroxy-1'-(3-cyanophenyl)methyl]cyclohexanone [(2S,1'R)-9f].** The representative procedure was followed using 3-cyanobenzaldehyde (13 mg, 0.10 mmol), cyclohexanone (52  $\mu$ L, 0.50 mmol) and catalyst **2** (33 mg, 0.01 mmol). Column chromatography on silica gel (eluting with 20% EtOAc/hexanes) afforded the product as

a white solid (18 mg, 80%). Enantiomeric excess: 97%, determined by HPLC (Daicel Chiralpak AD, *i*PrOH/hexane = 10:90),  $\lambda$  = 273 nm, flow rate 0.5 mL/min,  $t_{R\text{major}}$  = 46.924 min,  $t_{R\text{minor}}$  = 60.276 min; Data for the *anti* isomer (2S,1'R)-**9f**:  $[\alpha]_D^{20}$  = +28.0 ( $c$  = 0.30,  $CHCl_3$ ); m.p.: 69-72  $^{\circ}C$ ; IR (thin film): 3498, 2941, 2864, 2229, 1704, 1483, 1449, 1434, 1311, 1229, 1130, 1042, 805  $cm^{-1}$ ;  $^1H$  NMR (400 MHz,  $CDCl_3$ ):  $\delta$  7.64 (t,  $J$  = 1.2 Hz, 1H), 7.60 (dt,  $J$  = 7.6, 1.2 Hz, 1H), 7.57 (dt,  $J$  = 7.6, 1.2 Hz, 1H), 7.47 (t,  $J$  = 7.6 Hz, 1H), 4.82 (dd,  $J$  = 8.4, 2.8 Hz, 1H), 4.08 (d,  $J$  = 2.8 Hz, 1H), 2.61-2.54 (m, 1H), 2.53-2.48 (m, 1H), 2.41-2.33 (m, 1H), 2.15-2.09 (m, 1H), 1.85-1.80 (m, 1H), 1.67 (qt,  $J$  = 12.8, 4.0 Hz, 1H), 1.59-1.51 (m, 2H), 1.35 (qd,  $J$  = 12.8, 4.0 Hz, 1H);  $^{13}C$  NMR (100 MHz,  $CDCl_3$ ):  $\delta$  215.1, 142.8, 131.7, 130.9, 129.4, 118.9, 112.7, 74.2, 57.3, 42.8, 30.9, 27.8, 24.9; MS (ESI):  $m/z$  252 ( $M + Na$ ); HRMS (ESI) calcd for  $C_{14}H_{15}NO_2Na$  [ $M + Na$ ] $^+$  = 252.1000, found 252.0993.

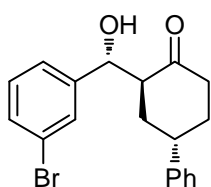

**(2S,4S,1'R)-4-Phenyl-2-[1'-Hydroxy-1'-(3-bromophenyl)methyl]cyclohexanone [(2S,4S,1'R)-9g].** The representative procedure was followed using 3-bromobenzaldehyde (18.5 mg, 0.10 mmol), 4-phenylcyclohexanone (87 mg, 0.50 mmol) and catalyst **2** (33 mg, 0.01 mmol). Column chromatography on silica gel

(eluting with 20% EtOAc/hexanes) afforded the product as a white solid (29.5 mg, 82%). Enantiomeric excess: 86%, determined by HPLC (Daicel Chiralpak AD, *i*PrOH/hexane = 20:80),  $\lambda$  = 218 nm, flow rate

1.0 mL/min,  $t_{R\text{minor}} = 16.316$  min,  $t_{R\text{major}} = 86.196$  min; Data for the *anti* isomer (2*S*,4*S*,1'*R*)-**9g**:  $[\alpha]_D^{20} = -6.0$  ( $c = 0.85$ ,  $\text{CHCl}_3$ ); m.p.: 109-112 °C; IR (thin film): 3417, 3060, 3028, 2931, 1710, 1596, 1571, 1496, 1456, 1429, 1326, 1197, 1155, 1071, 1040, 908, 790  $\text{cm}^{-1}$ ;  $^1\text{H}$  NMR (400 MHz,  $\text{CDCl}_3$ ):  $\delta$  7.53 (t,  $J = 1.6$  Hz, 1H), 7.47 (dt,  $J = 7.2, 1.6$  Hz, 1H), 7.33 (t,  $J = 7.2$  Hz, 2H), 7.29-7.22 (m, 3H), 7.47 (d,  $J = 7.2$  Hz, 2H), 4.93 (d,  $J = 9.6$  Hz, 1H), 3.38 (br s, 1H), 3.19-3.13 (m, 1H), 2.78 (dt,  $J = 9.6, 6.0$  Hz, 1H), 2.63-2.50 (m, 2H), 2.41-2.33 (m, 1H), 2.23-2.15 (m, 1H), 2.01-1.94 (m, 1H), 1.79-1.72 (m, 1H);  $^{13}\text{C}$  NMR (100 MHz,  $\text{CDCl}_3$ ):  $\delta$  214.1, 143.6, 142.9, 131.6, 130.4, 130.3, 129.0, 126.8, 126.7, 125.9, 123.0, 74.3, 54.9, 39.2, 37.2, 34.6, 31.8; MS (ESI):  $m/z$  381 (M + Na), 383 (M + 2 + Na); HRMS (ESI) calcd for  $\text{C}_{19}\text{H}_{19}\text{O}_2\text{BrNa}$   $[\text{M} + \text{Na}]^+ = 381.0466$ , found 381.0467.

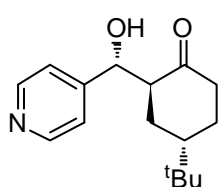

**(2*S*,4*S*,1'*R*)-4-*tert*-Butyl-2-[1'-Hydroxy-1'-(4-pyridyl)methyl]cyclohexanone [(2*S*,**

**4*S*,1'*R*)-9h].** The representative procedure was followed using 4-pyridinecarboxaldehyde (9.4  $\mu\text{L}$ , 0.10 mmol), 4-*tert*-butylcyclohexanone (77 mg, 0.50 mmol) and catalyst **2** (33 mg, 0.01 mmol). Column chromatography on silica gel (eluting with

75% EtOAc/hexanes) afforded the product as a white solid (22 mg, 85%). Enantiomeric excess: 75%, determined by HPLC (Daicel Chiralpak AD, *i*PrOH/hexane = 10:90),  $\lambda = 254$  nm, flow rate 1.0 mL/min,  $t_{R\text{minor}} = 14.548$  min,  $t_{R\text{major}} = 19.412$  min; Data for the *anti* isomer (2*S*,4*S*,1'*R*)-**9h**:  $[\alpha]_D^{20} = -68.0$  ( $c = 0.47$ ,  $\text{CHCl}_3$ ); m.p.: 129-132 °C; IR (thin film): 3432, 2960, 2870, 1713, 1604, 1564, 1478, 1415, 1366, 1331, 1226, 1152, 1099, 1049, 1005, 829, 735  $\text{cm}^{-1}$ ;  $^1\text{H}$  NMR (400 MHz,  $\text{CDCl}_3$ ):  $\delta$  8.62 (d,  $J = 6.0$  Hz, 2H), 7.29 (d,  $J = 6.0$  Hz, 2H), 4.85 (dd,  $J = 9.2, 3.2$  Hz, 1H), 3.55 (d,  $J = 3.2$  Hz, 1H), 2.65 (dt,  $J = 9.2, 6.4$  Hz, 1H), 2.53 (ddd,  $J = 16.8, 4.8, 2.8$  Hz, 1H), 2.47-2.38 (m, 1H), 2.00-1.95 (m, 1H), 1.65-1.41 (m, 4H), 1.60 (s, 9H);  $^{13}\text{C}$  NMR (100 MHz,  $\text{CDCl}_3$ ):  $\delta$  214.9, 151.3, 149.7, 122.1, 73.3, 55.3, 42.3, 39.3, 32.9, 27.9, 27.3, 25.7; MS (ESI):  $m/z$  284 (M + Na), 262 (M + H); HRMS (ESI) calcd for  $\text{C}_{16}\text{H}_{24}\text{NO}_2\text{Na}$   $[\text{M} + \text{Na}]^+ = 284.1626$ , found 284.1625.

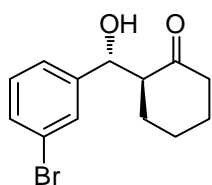

**(2*S*,1'*R*)-2-[1'-Hydroxy-1'-(3-bromophenyl)methyl]cyclohexanone [(2*S*,1'*R*)-9i].<sup>6</sup>**

The representative procedure was followed using 3-bromobenzaldehyde (18.5 mg, 0.10 mmol), cyclohexanone (52  $\mu\text{L}$ , 0.50 mmol) and catalyst **2** (33 mg, 0.01 mmol).

Column chromatography on silica gel (eluting with 20% EtOAc/hexanes) afforded the product as a colorless oil (23 mg, 82%). Enantiomeric excess: 86%, determined by HPLC (Daicel Chiralpak AD, *i*PrOH/hexane = 10:90),  $\lambda = 254$  nm, flow rate 0.5 mL/min,  $t_{R\text{major}} = 25.464$  min,  $t_{R\text{minor}} = 27.408$  min; Data for the *anti* isomer (2*S*,1'*R*)-**9i**:  $^1\text{H}$  NMR (400 MHz,  $\text{CDCl}_3$ ):  $\delta$  7.50 (t,  $J = 2.0$  Hz, 1H), 7.43 (dt,  $J = 7.2, 2.0$  Hz, 1H), 7.24-7.20 (m, 2H), 4.75 (d,  $J = 8.8$  Hz, 1H), 2.58-2.51 (m, 1H), 2.49-2.46 (m, 1H), 2.41-2.33 (m, 1H), 2.13-2.08 (m, 1H), 1.84-1.79 (m, 1H), 1.69-1.55 (m, 3H), 1.38-1.27 (m, 1H).



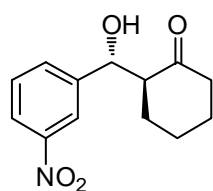

**(2*S*,1'*R*)-2-[1'-Hydroxy-1'-(3-nitrophenyl)methyl]cyclohexanone [(2*S*,1'*R*)-9j].<sup>3</sup>**

The representative procedure was followed using 3-nitrobenzaldehyde (15 mg, 0.10 mmol), cyclohexanone (52  $\mu$ L, 0.50 mmol) and catalyst **2** (33 mg, 0.01 mmol).

Column chromatography on silica gel (eluting with 20% EtOAc/hexanes) afforded the product as a white solid (22 mg, 91%). Enantiomeric excess: 91%, determined by HPLC (Daicel Chiralpak AD, *i*PrOH/hexane = 10:90),  $\lambda$  = 254 nm, flow rate 0.5 mL/min,  $t_{R\text{major}}$  = 44.864 min,  $t_{R\text{minor}}$  = 58.564 min; Data for the *anti* isomer (2*S*,1'*R*)-**9j**: <sup>1</sup>H NMR (400 MHz, CDCl<sub>3</sub>):  $\delta$  8.22 (t, *J* = 1.2 Hz, 1H), 8.17 (dt, *J* = 8.0, 1.2 Hz, 1H), 7.68 (dt, *J* = 8.0, 1.2 Hz, 1H), 7.54 (t, *J* = 8.0 Hz, 1H), 4.90 (dd, *J* = 8.4, 3.2 Hz, 1H), 4.13 (d, *J* = 3.2 Hz, 1H), 2.65-2.60 (m, 1H), 2.54-2.49 (m, 1H), 2.42-2.33 (m, 1H), 2.15-2.11 (m, 1H), 1.86-1.80 (m, 1H), 1.70-1.55 (m, 3H), 1.42-1.38 (m, 1H).

**General procedure for catalyst recycling (Table 3).** 4-nitrobenzaldehyde (60 mg, 0.40 mmol), cyclohexanone (208  $\mu$ L, 2.00 mmol) and catalyst **2** (132 mg, 0.04 mmol) were sequentially added into a Teflon-coated-stir-bar-containing glass vial at room temperature. H<sub>2</sub>O (1.0 mL) was added and the resulting solution was allowed to stir at room temperature for 24 hours. Then EtOAc (3 mL) was added to the reaction mixture and stirred for 10 sec. The reaction mixture was then allowed to separate and the upper (EtOAc) layer was removed by pipet. The aqueous layer was successively washed with EtOAc (3 x 3 mL). The combined EtOAc extracts layers were evaporated to afford the crude product, which was purified by flash column chromatography on silica gel eluting with 20% EtOAc/hexane afforded the aldol product. Then for the second run, above 4-nitrobenzaldehyde (60 mg, 0.40 mmol), cyclohexanone (208  $\mu$ L, 2.00 mmol) were added again to the same reaction vessel and stirred at room temperature for another 24 hours. The work up was conducted in exactly the same way as described for the first cycle. This reaction was repeated two more times, each using the above substrates.

List of obvious difference between *syn-9* and *anti-9* on  $^1\text{H}$  NMR

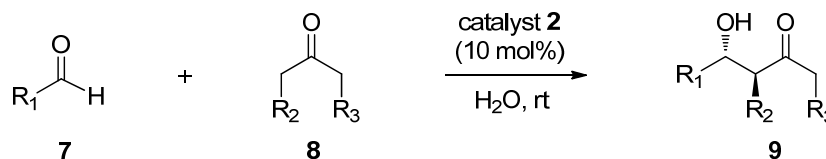

| entry | R <sub>1</sub>                                    | R <sub>2</sub> R <sub>3</sub>                          | product   | $^1\text{H}$ NMR (-CHOH)    |                                   |
|-------|---------------------------------------------------|--------------------------------------------------------|-----------|-----------------------------|-----------------------------------|
|       |                                                   |                                                        |           | <i>syn</i>                  | <i>anti</i>                       |
| –     | 4-O <sub>2</sub> NC <sub>6</sub> H <sub>4</sub> - | —(CH <sub>2</sub> ) <sub>3</sub> —                     | —         | 5.48 (d, <i>J</i> = 1.6 Hz) | 4.90 (dd, <i>J</i> = 8.4, 3.2 Hz) |
| 1     | 4-ClC <sub>6</sub> H <sub>4</sub> -               | —(CH <sub>2</sub> ) <sub>3</sub> —                     | <b>9a</b> | 5.34 (d, <i>J</i> = 2.0 Hz) | 4.74 (dd, <i>J</i> = 8.8, 2.4 Hz) |
| 2     | 4-pyridinyl-                                      | —(CH <sub>2</sub> ) <sub>3</sub> —                     | <b>9b</b> | 5.39 (br s)                 | 4.78 (dd, <i>J</i> = 8.4, 3.2 Hz) |
| 3     | 2-naphthyl-                                       | —(CH <sub>2</sub> ) <sub>3</sub> —                     | <b>9c</b> | 5.58 (d, <i>J</i> = 2.8 Hz) | 4.98 (dd, <i>J</i> = 8.8, 2.4 Hz) |
| 4     | 3-BrC <sub>6</sub> H <sub>4</sub> -               | —(CH <sub>2</sub> CH <sup>t</sup> BuCH <sub>2</sub> )— | <b>9d</b> | 5.34 (d, <i>J</i> = 1.6 Hz) | 4.86 (d, <i>J</i> = 8.6 Hz)       |
| 5     | 4-O <sub>2</sub> NC <sub>6</sub> H <sub>4</sub> - | —(CH <sub>2</sub> CH <sup>t</sup> BuCH <sub>2</sub> )— | <b>9e</b> | 5.48 (d, <i>J</i> = 1.6 Hz) | 4.97 (dd, <i>J</i> = 8.8, 2.8 Hz) |
| 6     | 3-CNC <sub>6</sub> H <sub>4</sub> -               | —(CH <sub>2</sub> ) <sub>3</sub> —                     | <b>9f</b> | 5.42 (br s)                 | 4.82 (dd, <i>J</i> = 8.4, 2.8 Hz) |
| 7     | 3-BrC <sub>6</sub> H <sub>4</sub> -               | —(CH <sub>2</sub> CHPhCH <sub>2</sub> )—               | <b>9g</b> | 5.41 (d, <i>J</i> = 1.6 Hz) | 4.93 (d, <i>J</i> = 9.6 Hz)       |
| 8     | 4-pyridinyl-                                      | —(CH <sub>2</sub> CH <sup>t</sup> BuCH <sub>2</sub> )— | <b>9h</b> | 5.33 (d, <i>J</i> = 1.6 Hz) | 4.85 (dd, <i>J</i> = 9.2, 3.2 Hz) |
| 9     | 3-BrC <sub>6</sub> H <sub>4</sub> -               | —(CH <sub>2</sub> ) <sub>3</sub> —                     | <b>9i</b> | 5.36 (d, <i>J</i> = 1.6 Hz) | 4.75 (d, <i>J</i> = 8.8 Hz)       |
| 10    | 3-O <sub>2</sub> NC <sub>6</sub> H <sub>4</sub> - | —(CH <sub>2</sub> ) <sub>3</sub> —                     | <b>9j</b> | 5.48 (d, <i>J</i> = 2.0 Hz) | 4.90 (dd, <i>J</i> = 8.4, 3.2 Hz) |

## References

- Barrett, A. G. M.; Pilipauskas, D. *J. Org. Chem.* **1991**, *56*, 2787-2800.
- Lipshutz, B. H.; Ghorai, S. *Org. Lett.* **2009**, *11*, 705-708.
- Mase, N.; Nakai, Y.; Ohara, N.; Yoda, H.; Takabe, K.; Tanaka, F.; Barbas, C. F. *J. Am. Chem. Soc.* **2006**, *128*, 734-735.
- Hayashi, Y.; Sumiya, T.; Takahashi, J.; Gotoh, H.; Urushima, T.; Shoji, M. *Angew. Chem. Int. Ed.* **2006**, *45*, 958-961.
- Jiang, J.; He, L.; Luo, S.-W.; Cun, L.-F.; Gong, L.-Z. *Chem. Commun.* **2007**, 736-738.
- Fu, Y.-Q.; Li, Z.-C.; Ding, L.-N.; Tao, J.-C.; Zhang, S.-H.; Tang, M.-S. *Tetrahedron: Asymmetry* **2006**, *17*, 3351-3357.

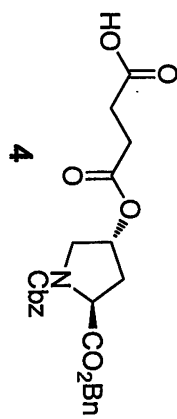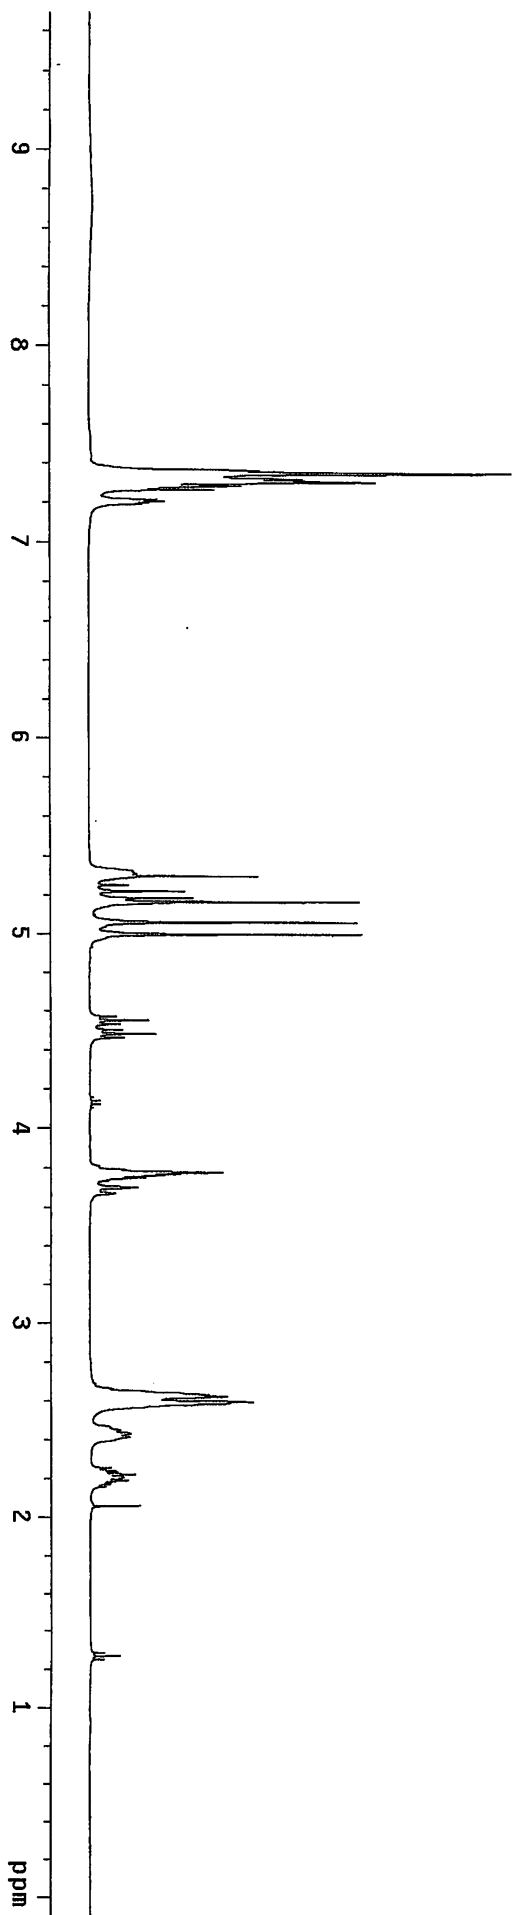

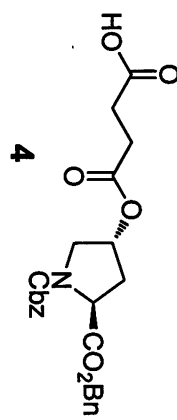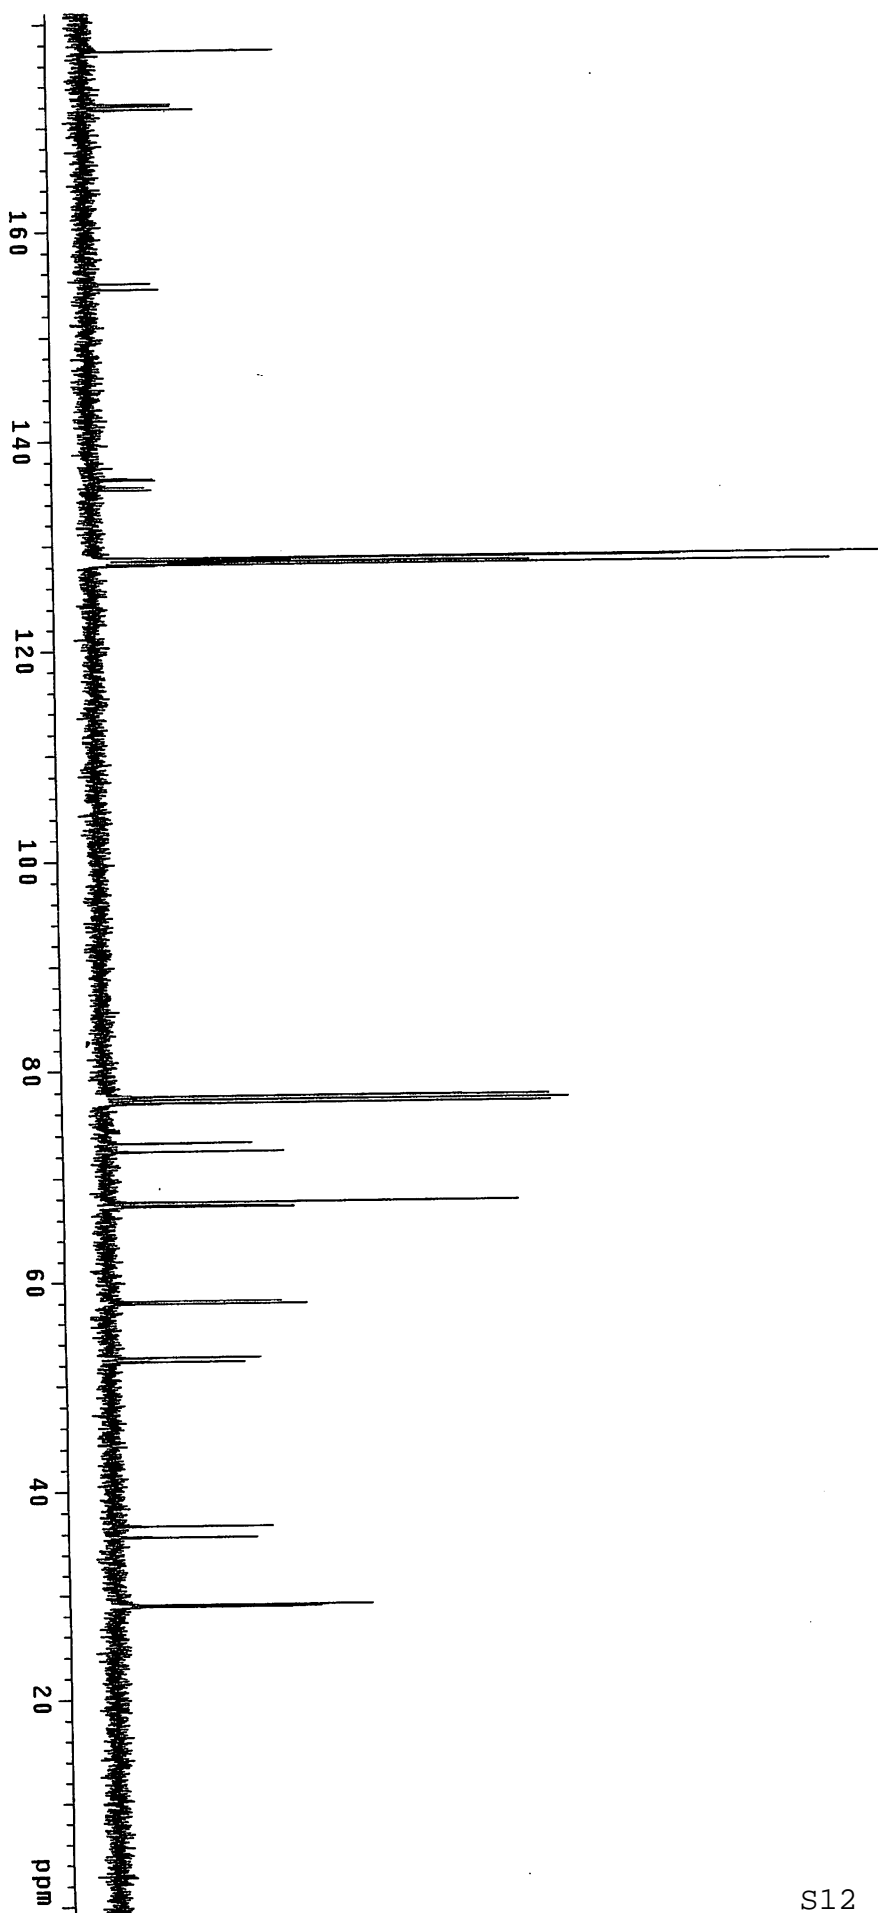



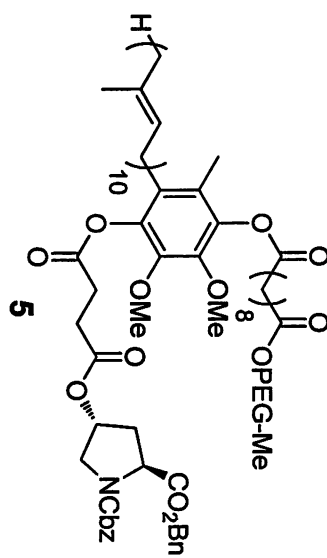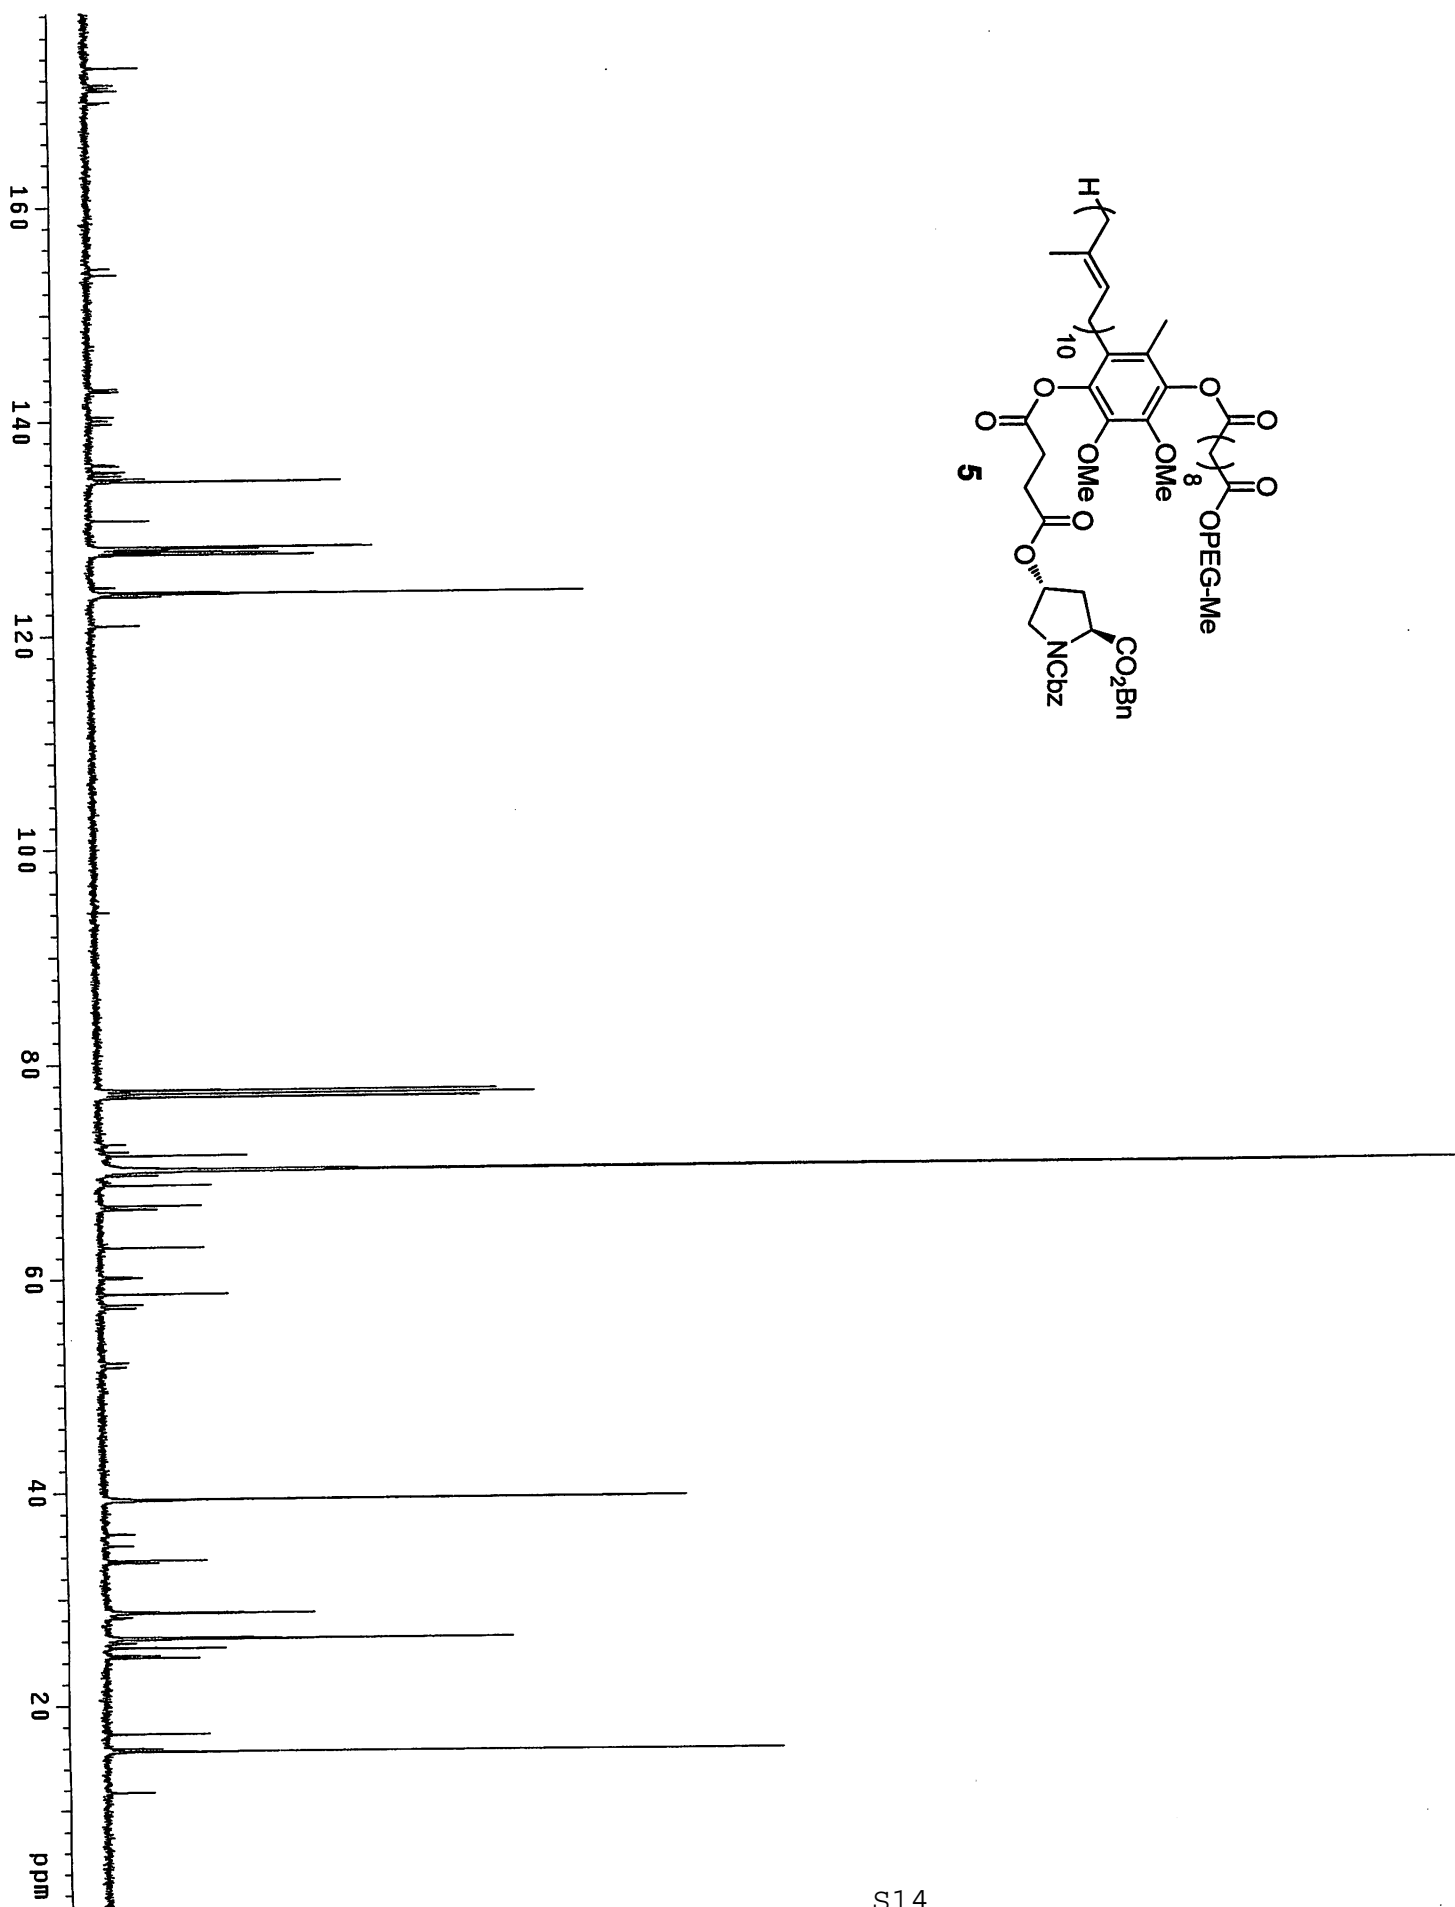



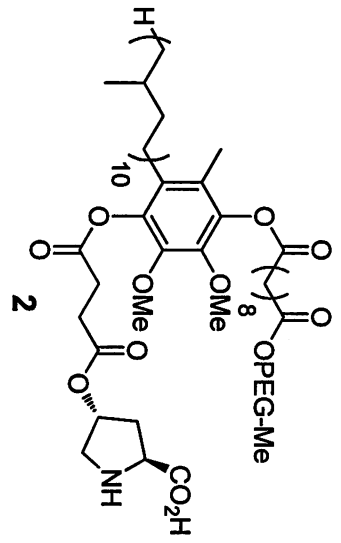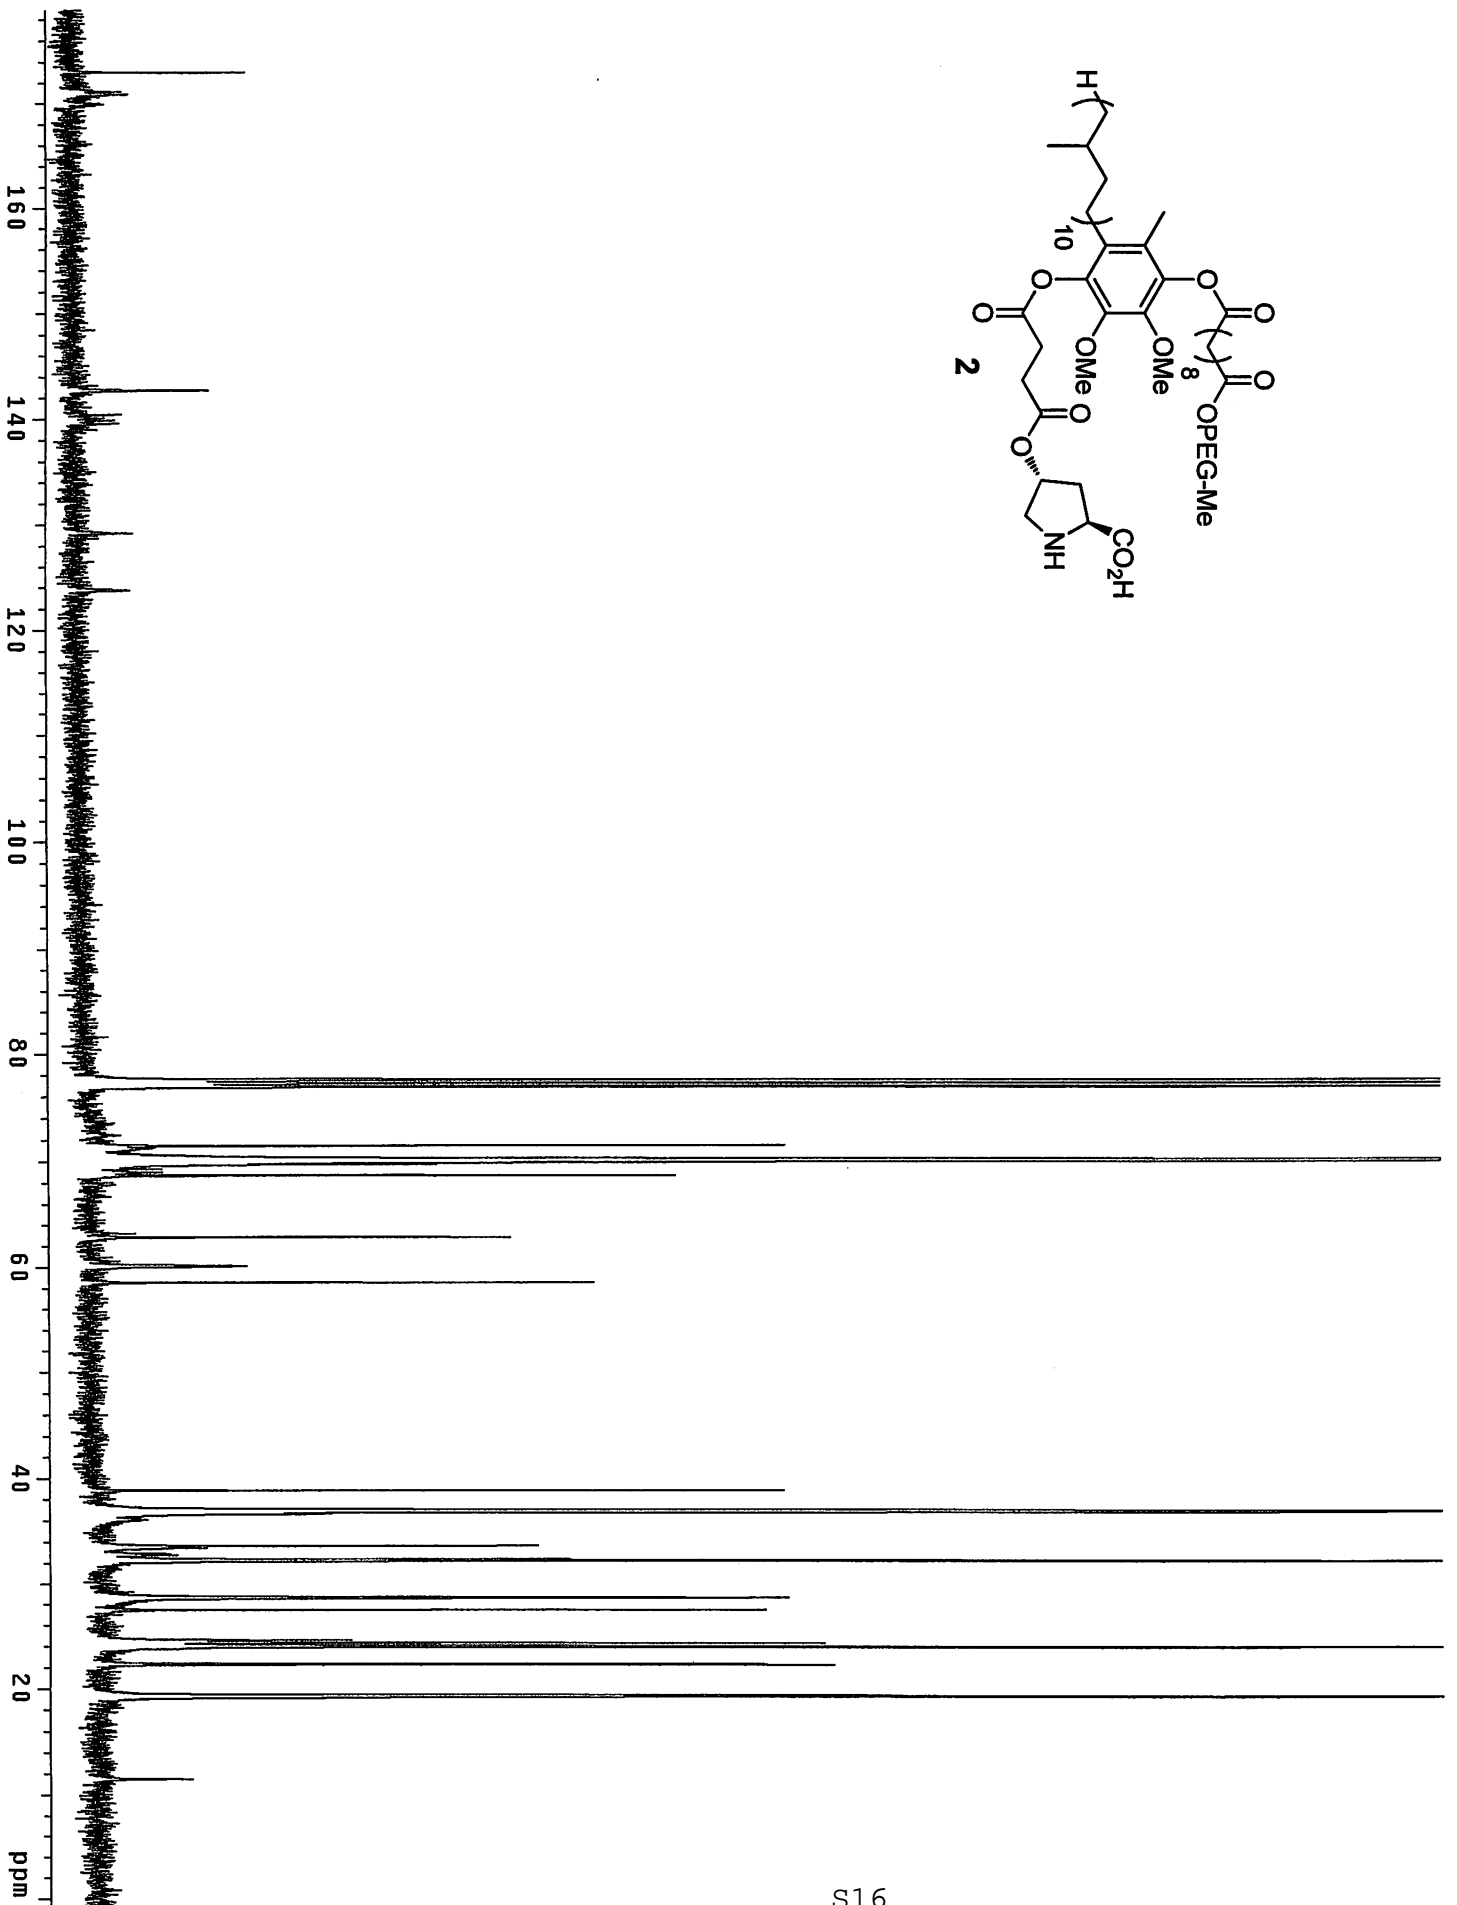



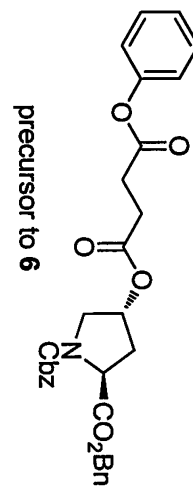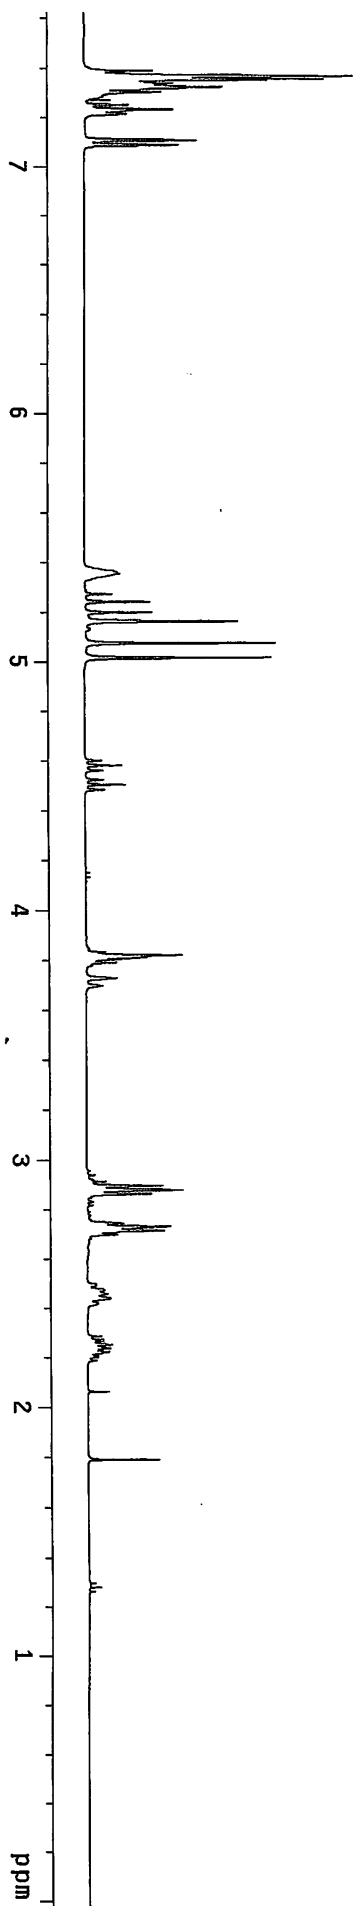

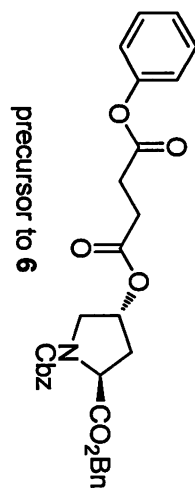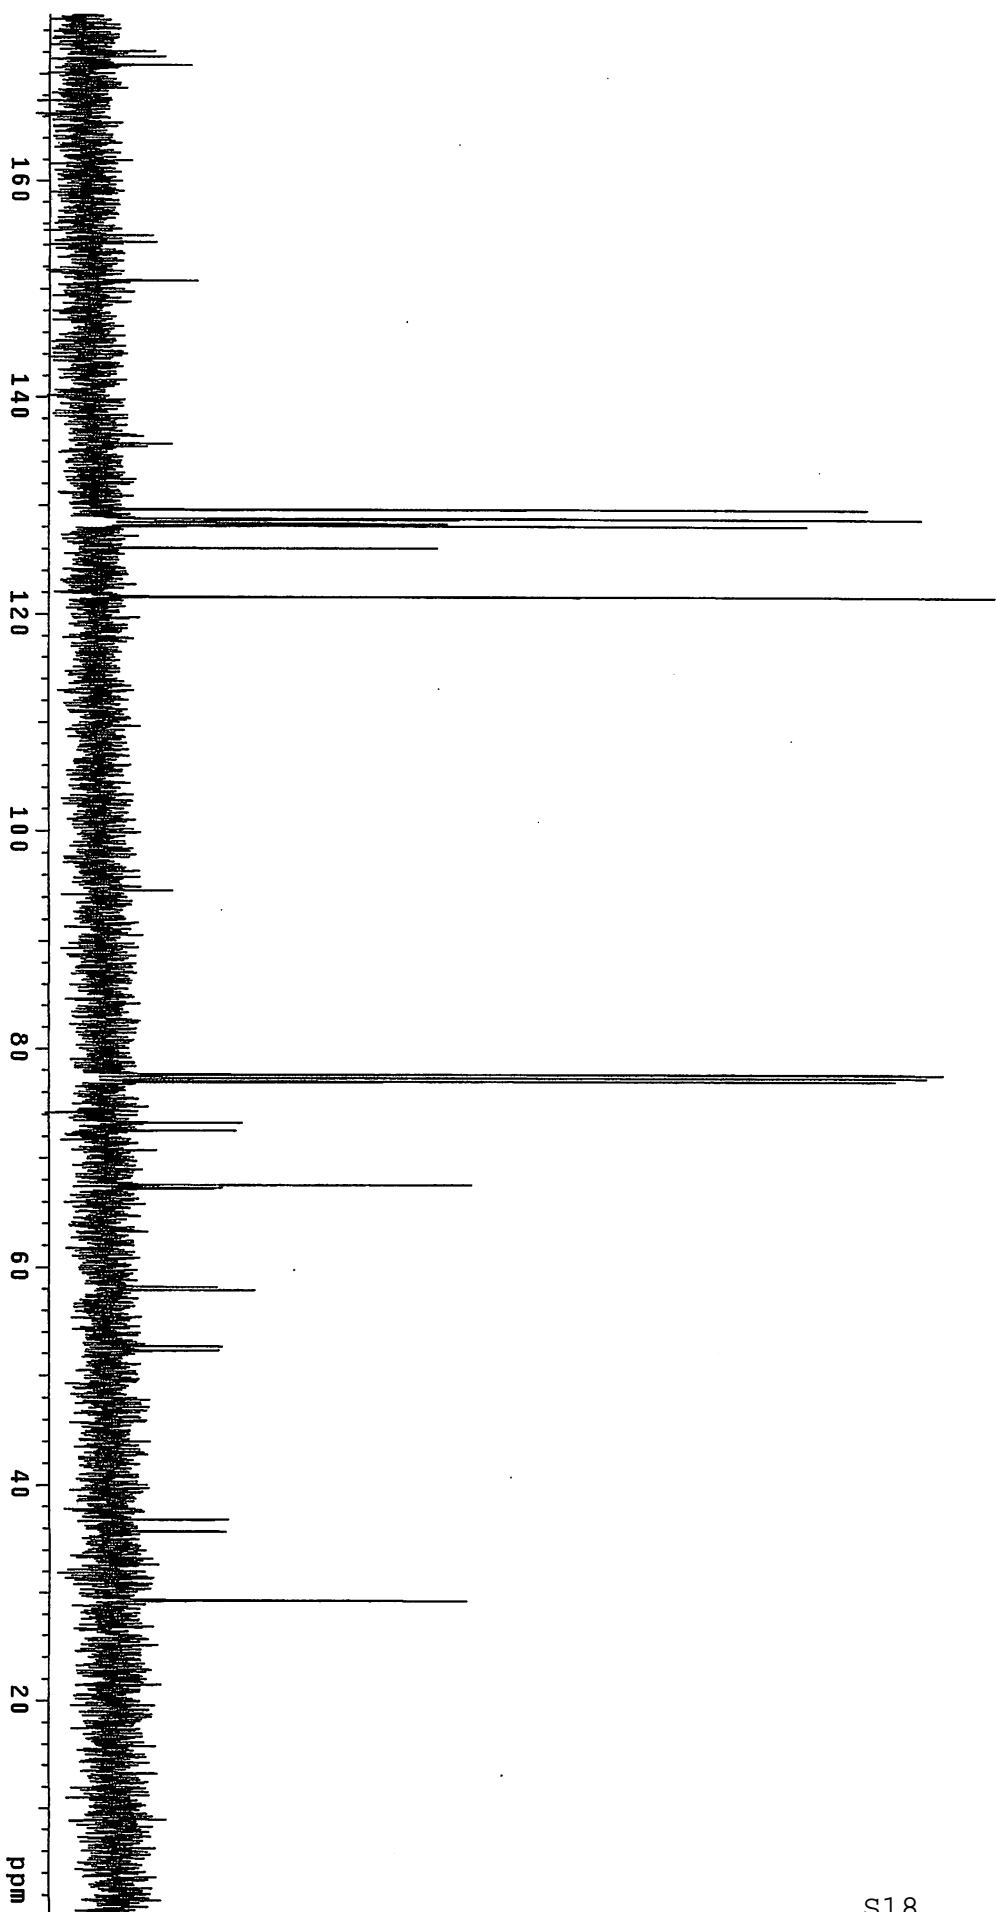

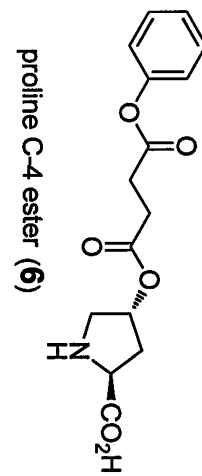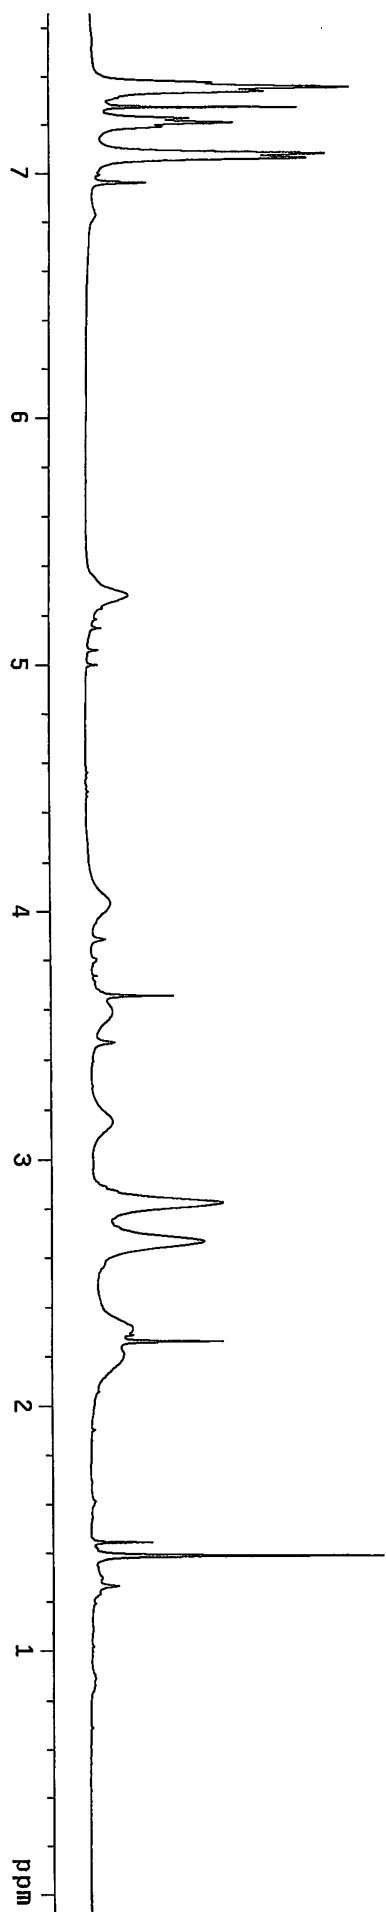

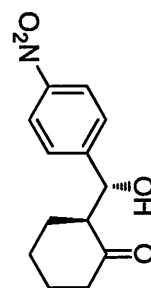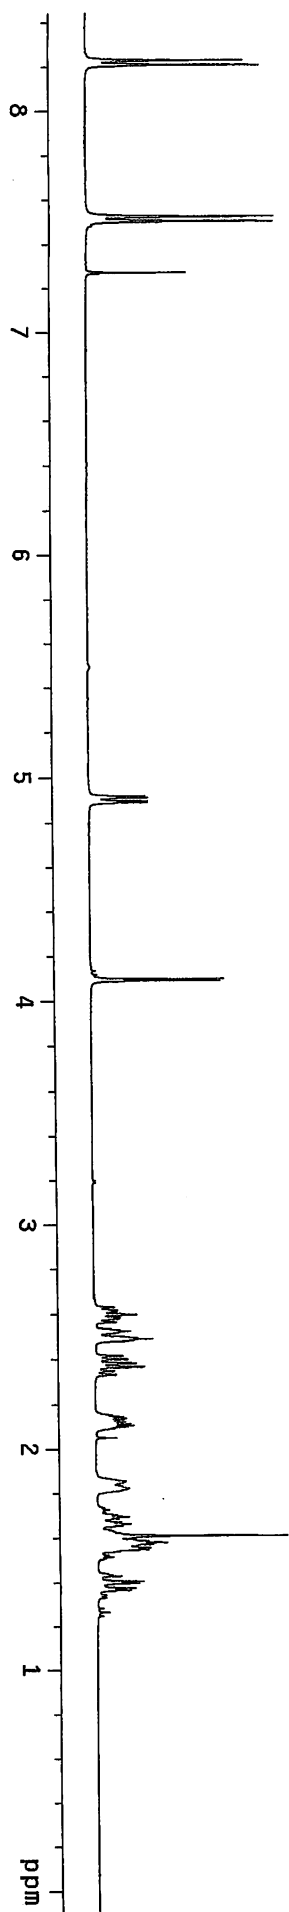

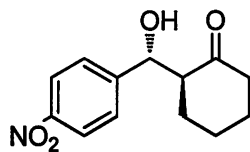

Daicel Chiralpak AD Column  
 iPrOH/hexane = 20:80,  $\lambda = 254 \text{ nm}$ , flow rate = 0.5 mL/min.

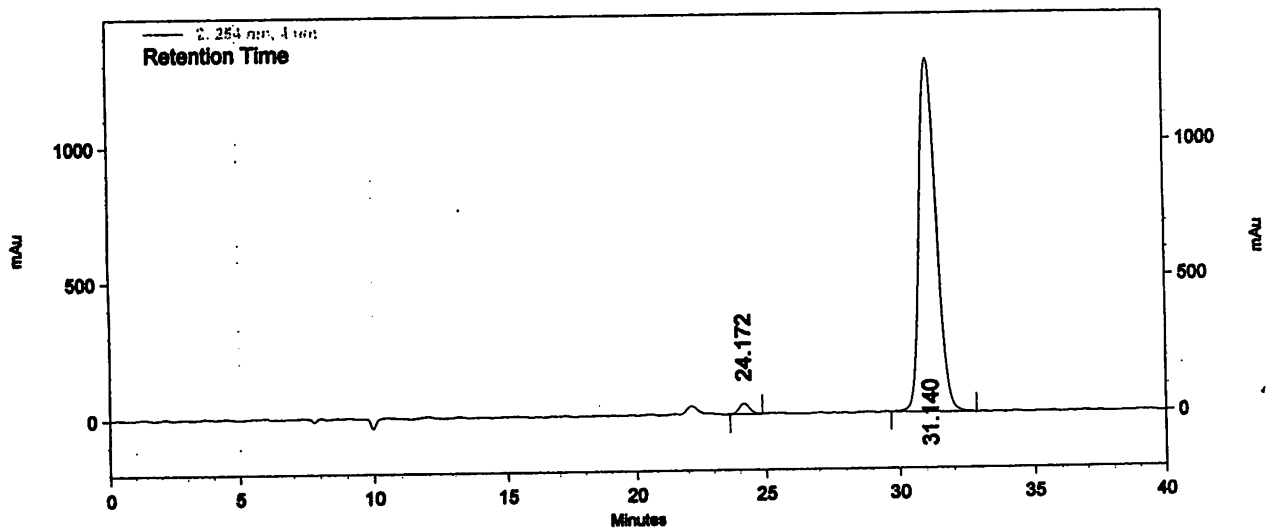

**2: 254 nm, 4 nm Results**

| Retention Time | Area            | Area %        |
|----------------|-----------------|---------------|
| 24.172         | 1085525         | 1.88          |
| 31.140         | 56629040        | 98.12         |
| <b>Totals</b>  | <b>57714565</b> | <b>100.00</b> |

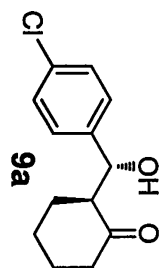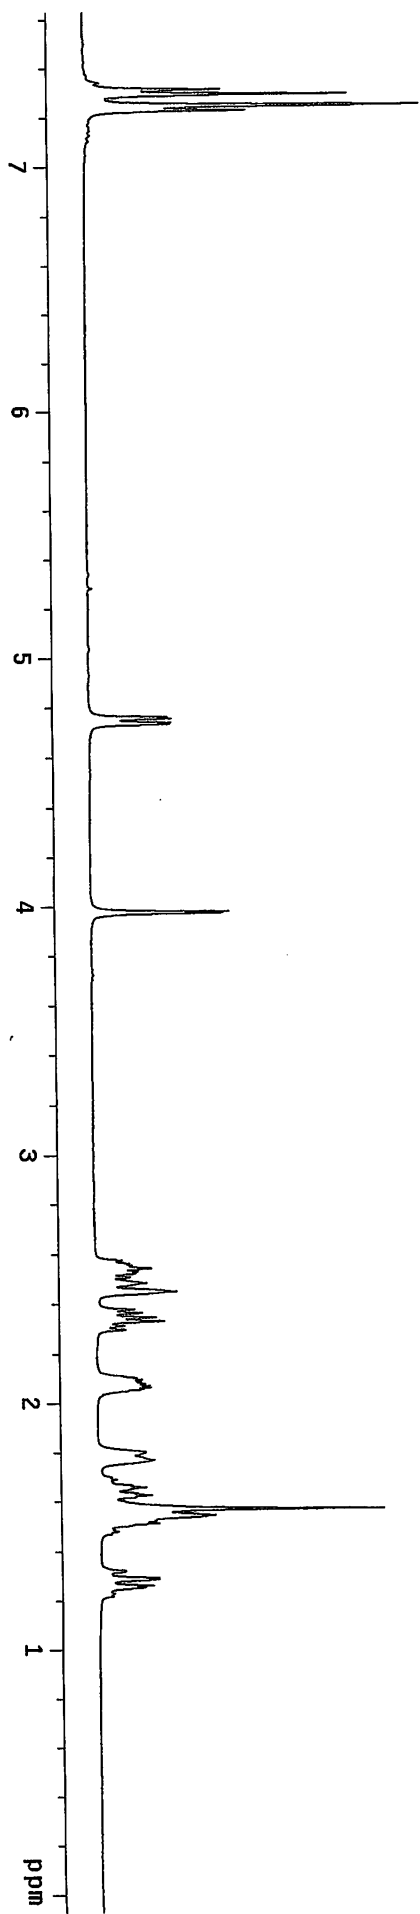

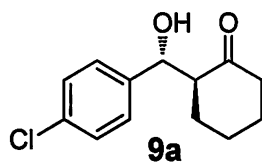

Daicel Chiralpak AD Column  
iPrOH/hexane = 10:90,  $\lambda$  = 254 nm, flow rate = 0.5 mL/min.

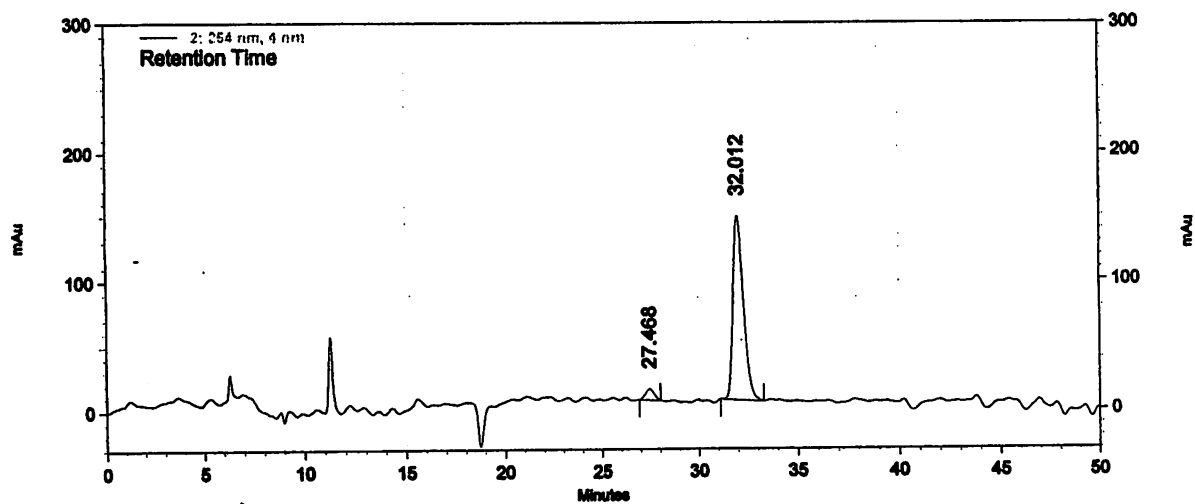

**2: 254 nm, 4 nm Results**

| Retention Time | Area           | Area %        |
|----------------|----------------|---------------|
| 27.468         | 262725         | 4.81          |
| 32.012         | 5199420        | 95.19         |
| <b>Totals</b>  | <b>5462145</b> | <b>100.00</b> |

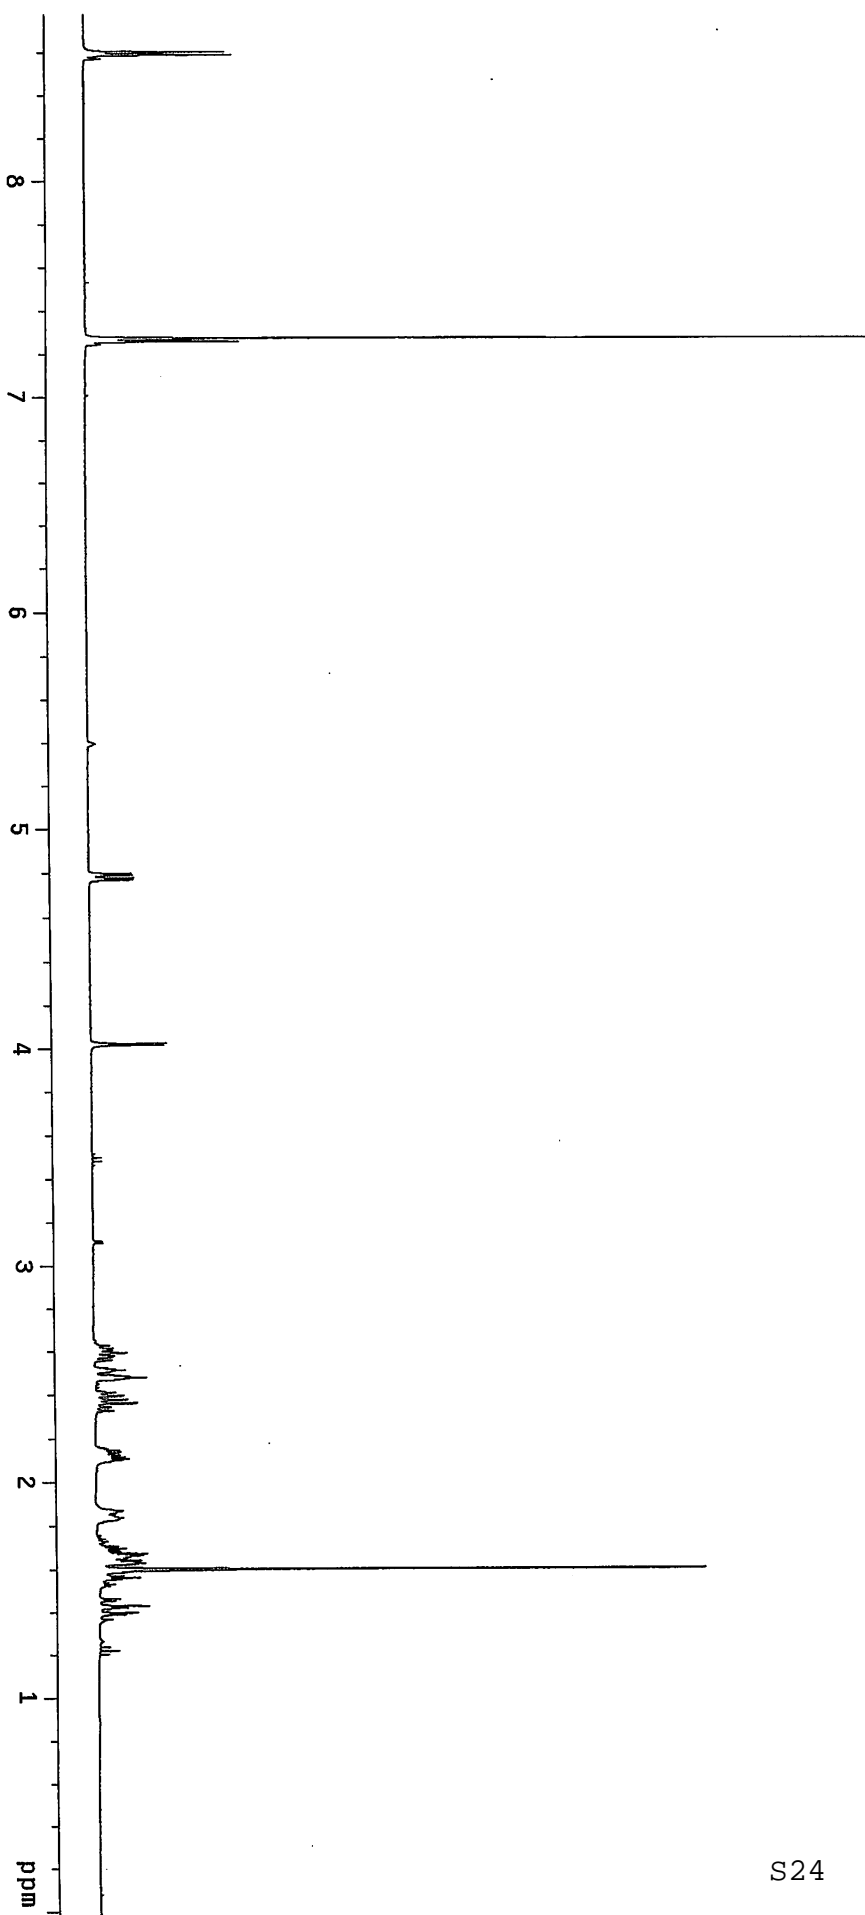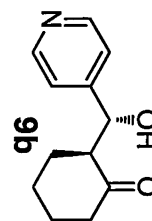



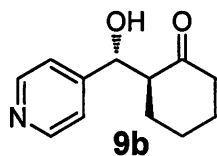

Daicel Chiralpak AD Column  
 iPrOH/hexane = 10:90,  $\lambda = 254 \text{ nm}$ , flow rate = 0.5 mL/min.

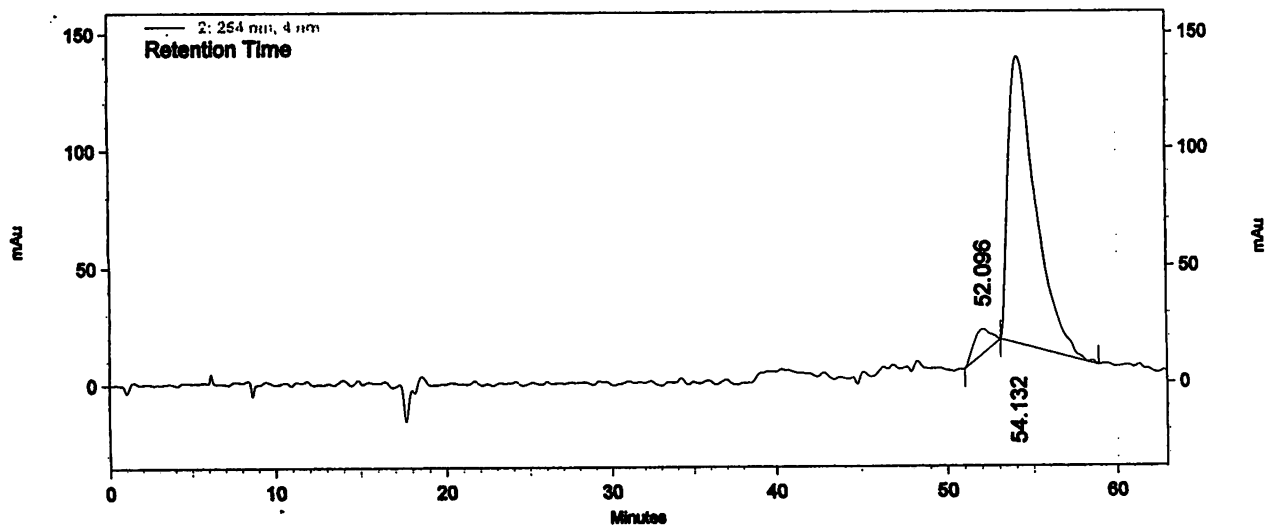

**2: 254 nm, 4 nm Results**

| Retention Time | Area            | Area %        |
|----------------|-----------------|---------------|
| 52.096         | 747289          | 5.18          |
| 54.132         | 13685708        | 94.82         |
| <b>Totals</b>  | <b>14432997</b> | <b>100.00</b> |

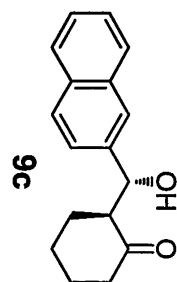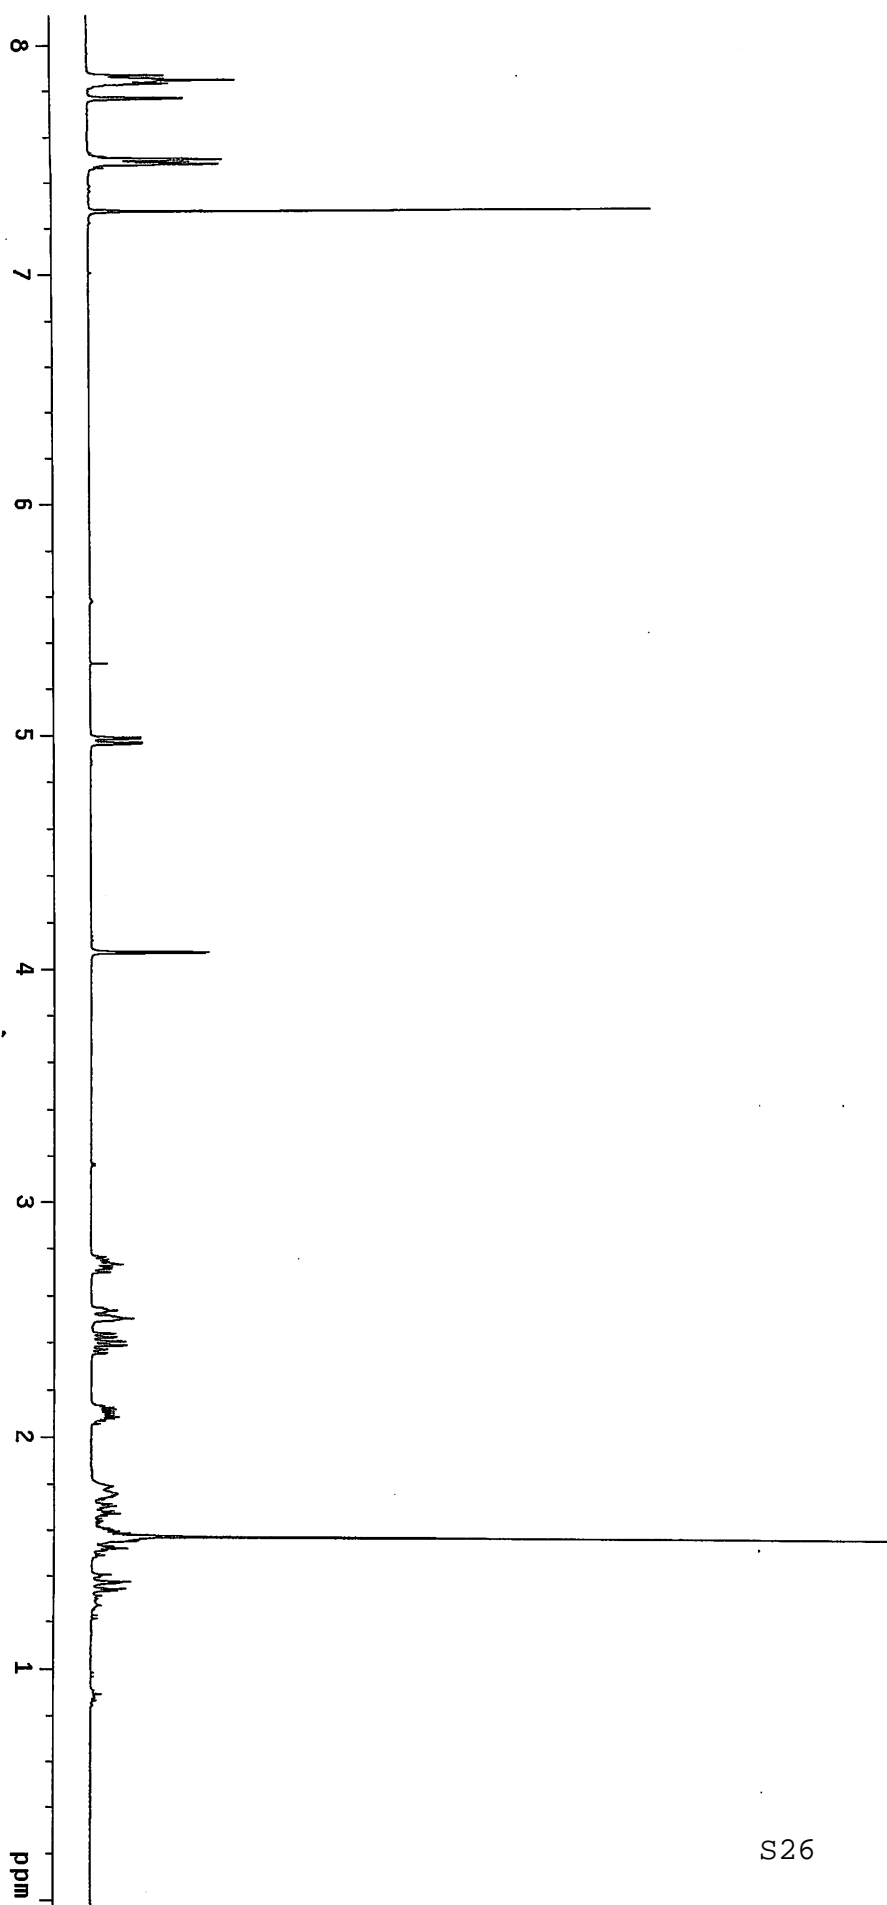

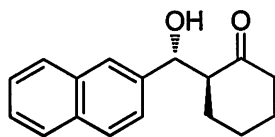

**9c**

Daicel Chiralpak AD Column

iPrOH/hexane = 5:95,  $\lambda$  = 254 nm, flow rate = 0.5 mL/min.

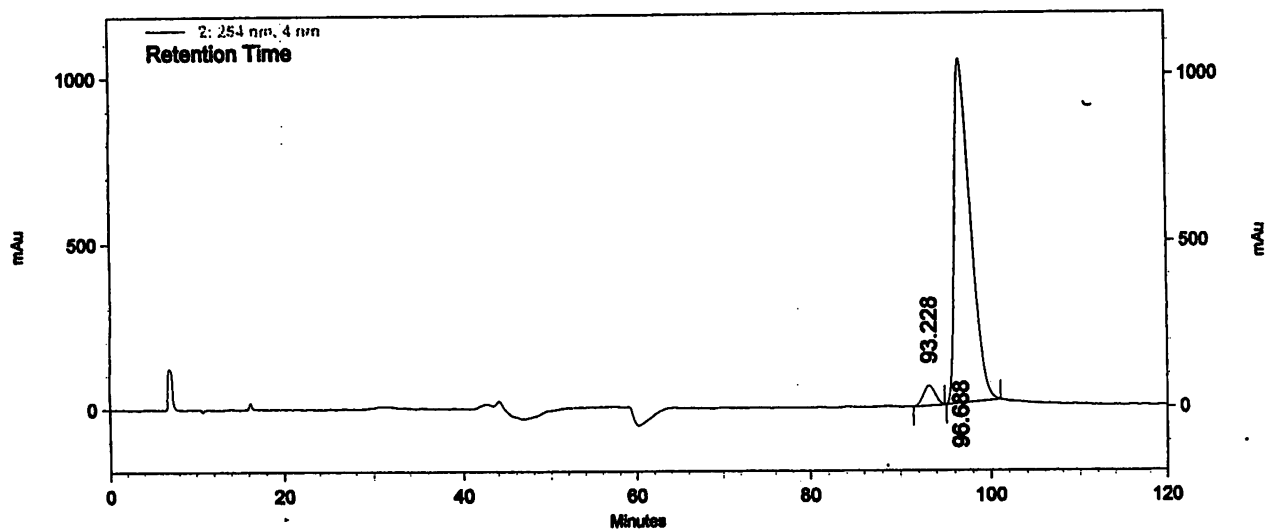

**2: 254 nm, 4 nm Results**

| Retention Time | Area             | Area %        |
|----------------|------------------|---------------|
| 93.228         | 5412304          | 4.10          |
| 96.688         | 126657472        | 95.90         |
| <b>Totals</b>  | <b>132069776</b> | <b>100.00</b> |

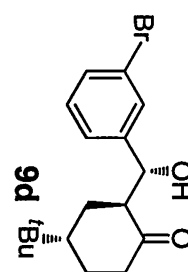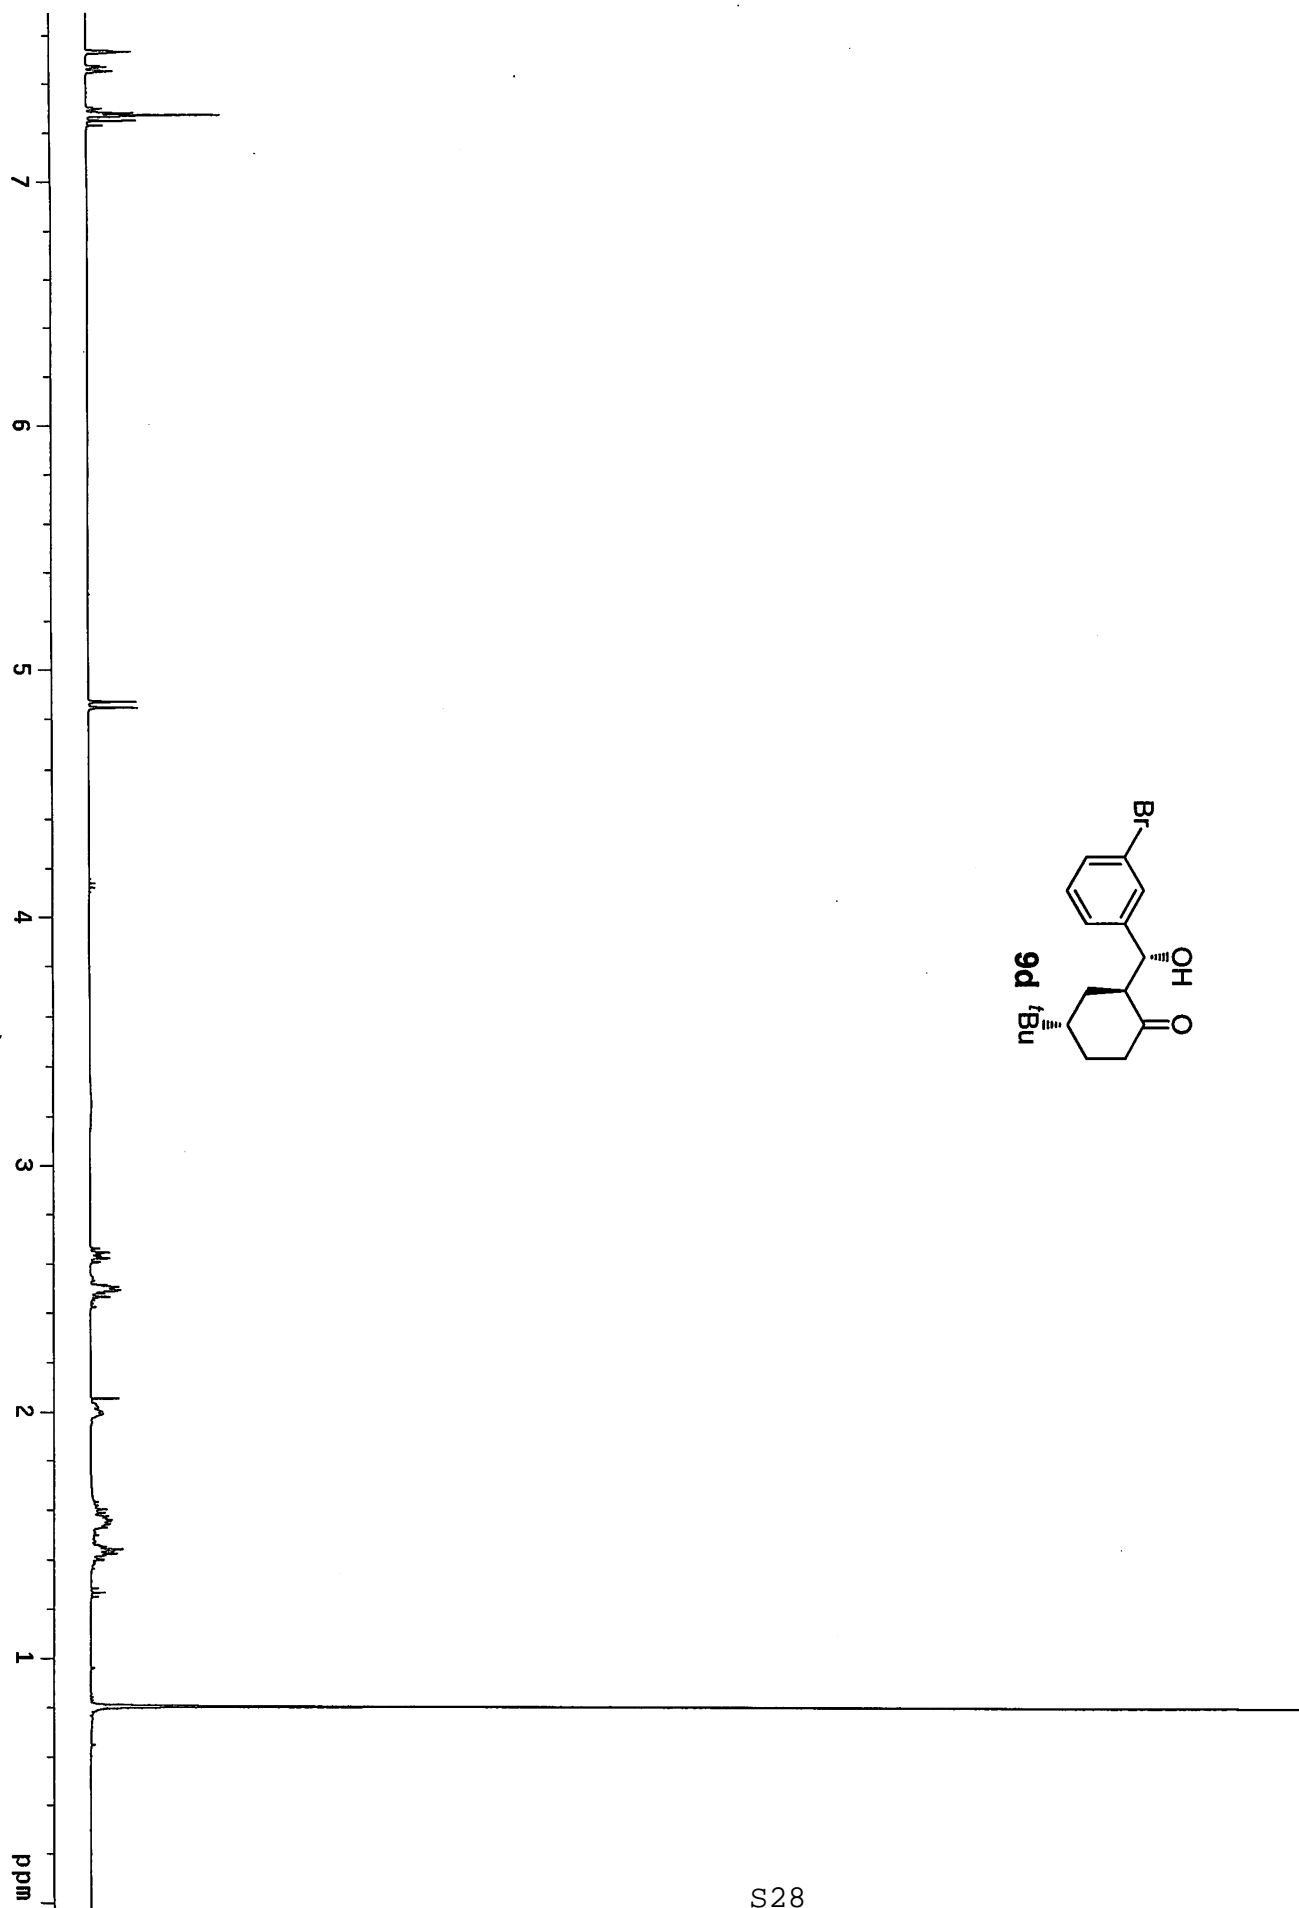

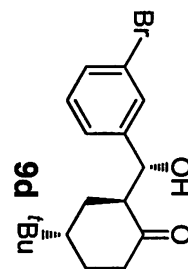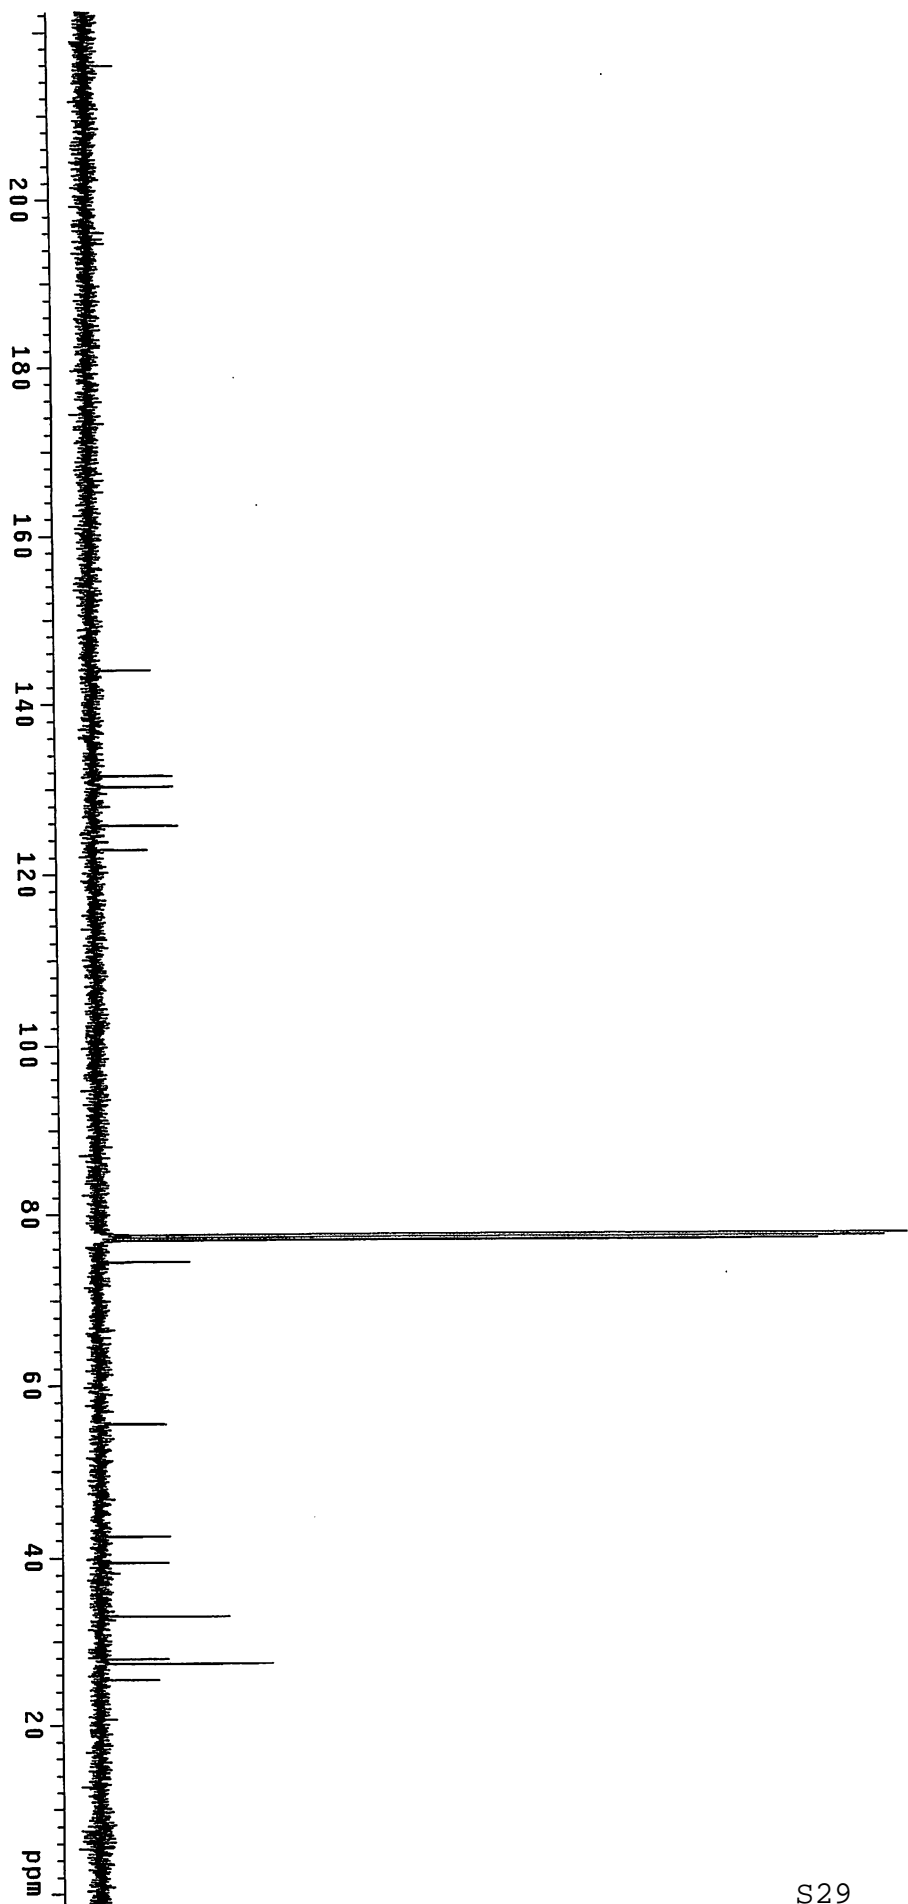

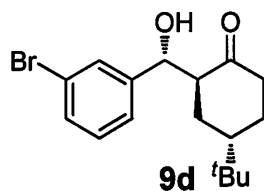

Daicel Chiralpak AD Column  
 iPrOH/hexane = 10:90,  $\lambda = 254 \text{ nm}$ , flow rate = 0.5 mL/min.

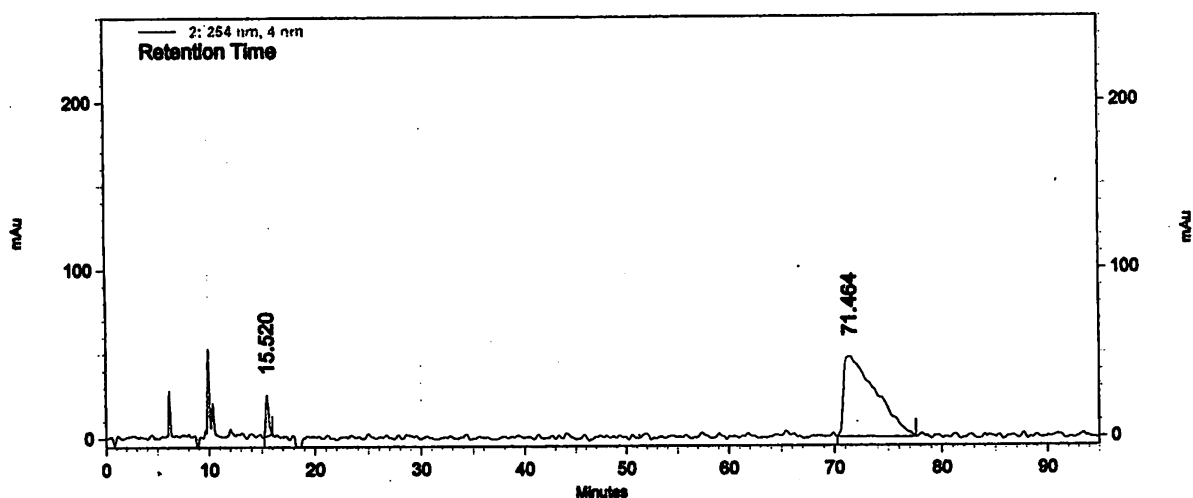

**2: 254 nm, 4 nm Results**

| Retention Time | Area            | Area %        |
|----------------|-----------------|---------------|
| 15.520         | 452150          | 4.39          |
| 71.464         | 9858024         | 95.61         |
| <b>Totals</b>  | <b>10310174</b> | <b>100.00</b> |

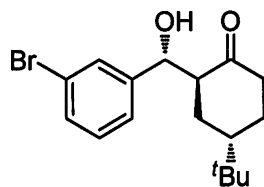

**9d (racemic)**

Daicel Chiralpak AD Column  
 iPrOH/hexane = 10:90,  $\lambda$  = 254 nm, flow rate = 0.5 mL/min.

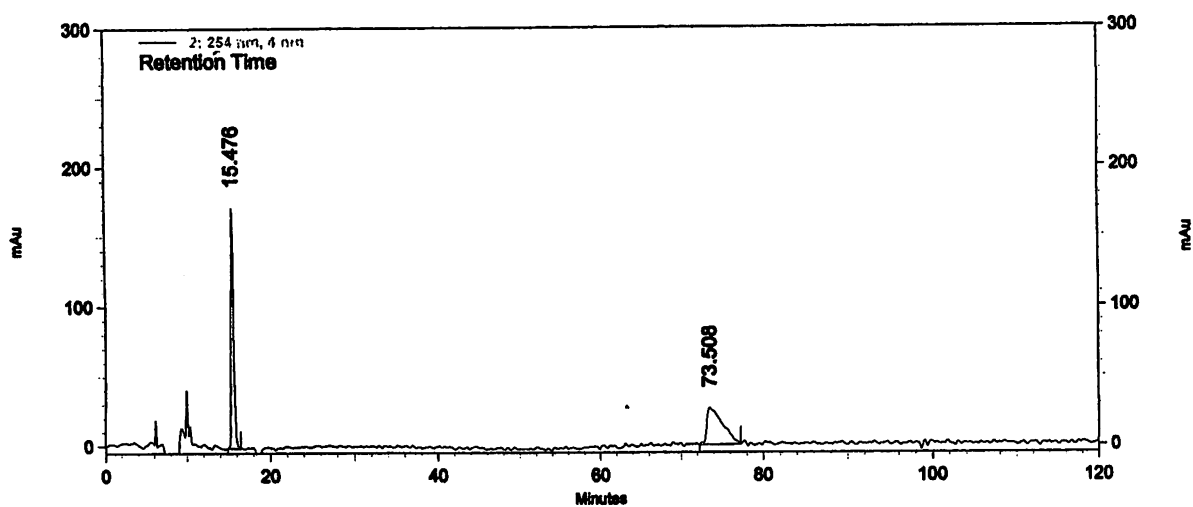

**2: 254 nm, 4 nm Results**

| Retention Time | Area           | Area %        |
|----------------|----------------|---------------|
| 15.476         | 3653099        | 50.93         |
| 73.508         | 3519557        | 49.07         |
| <b>Totals</b>  | <b>7172656</b> | <b>100.00</b> |

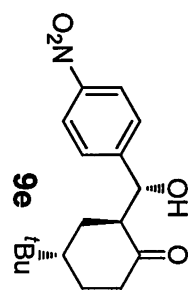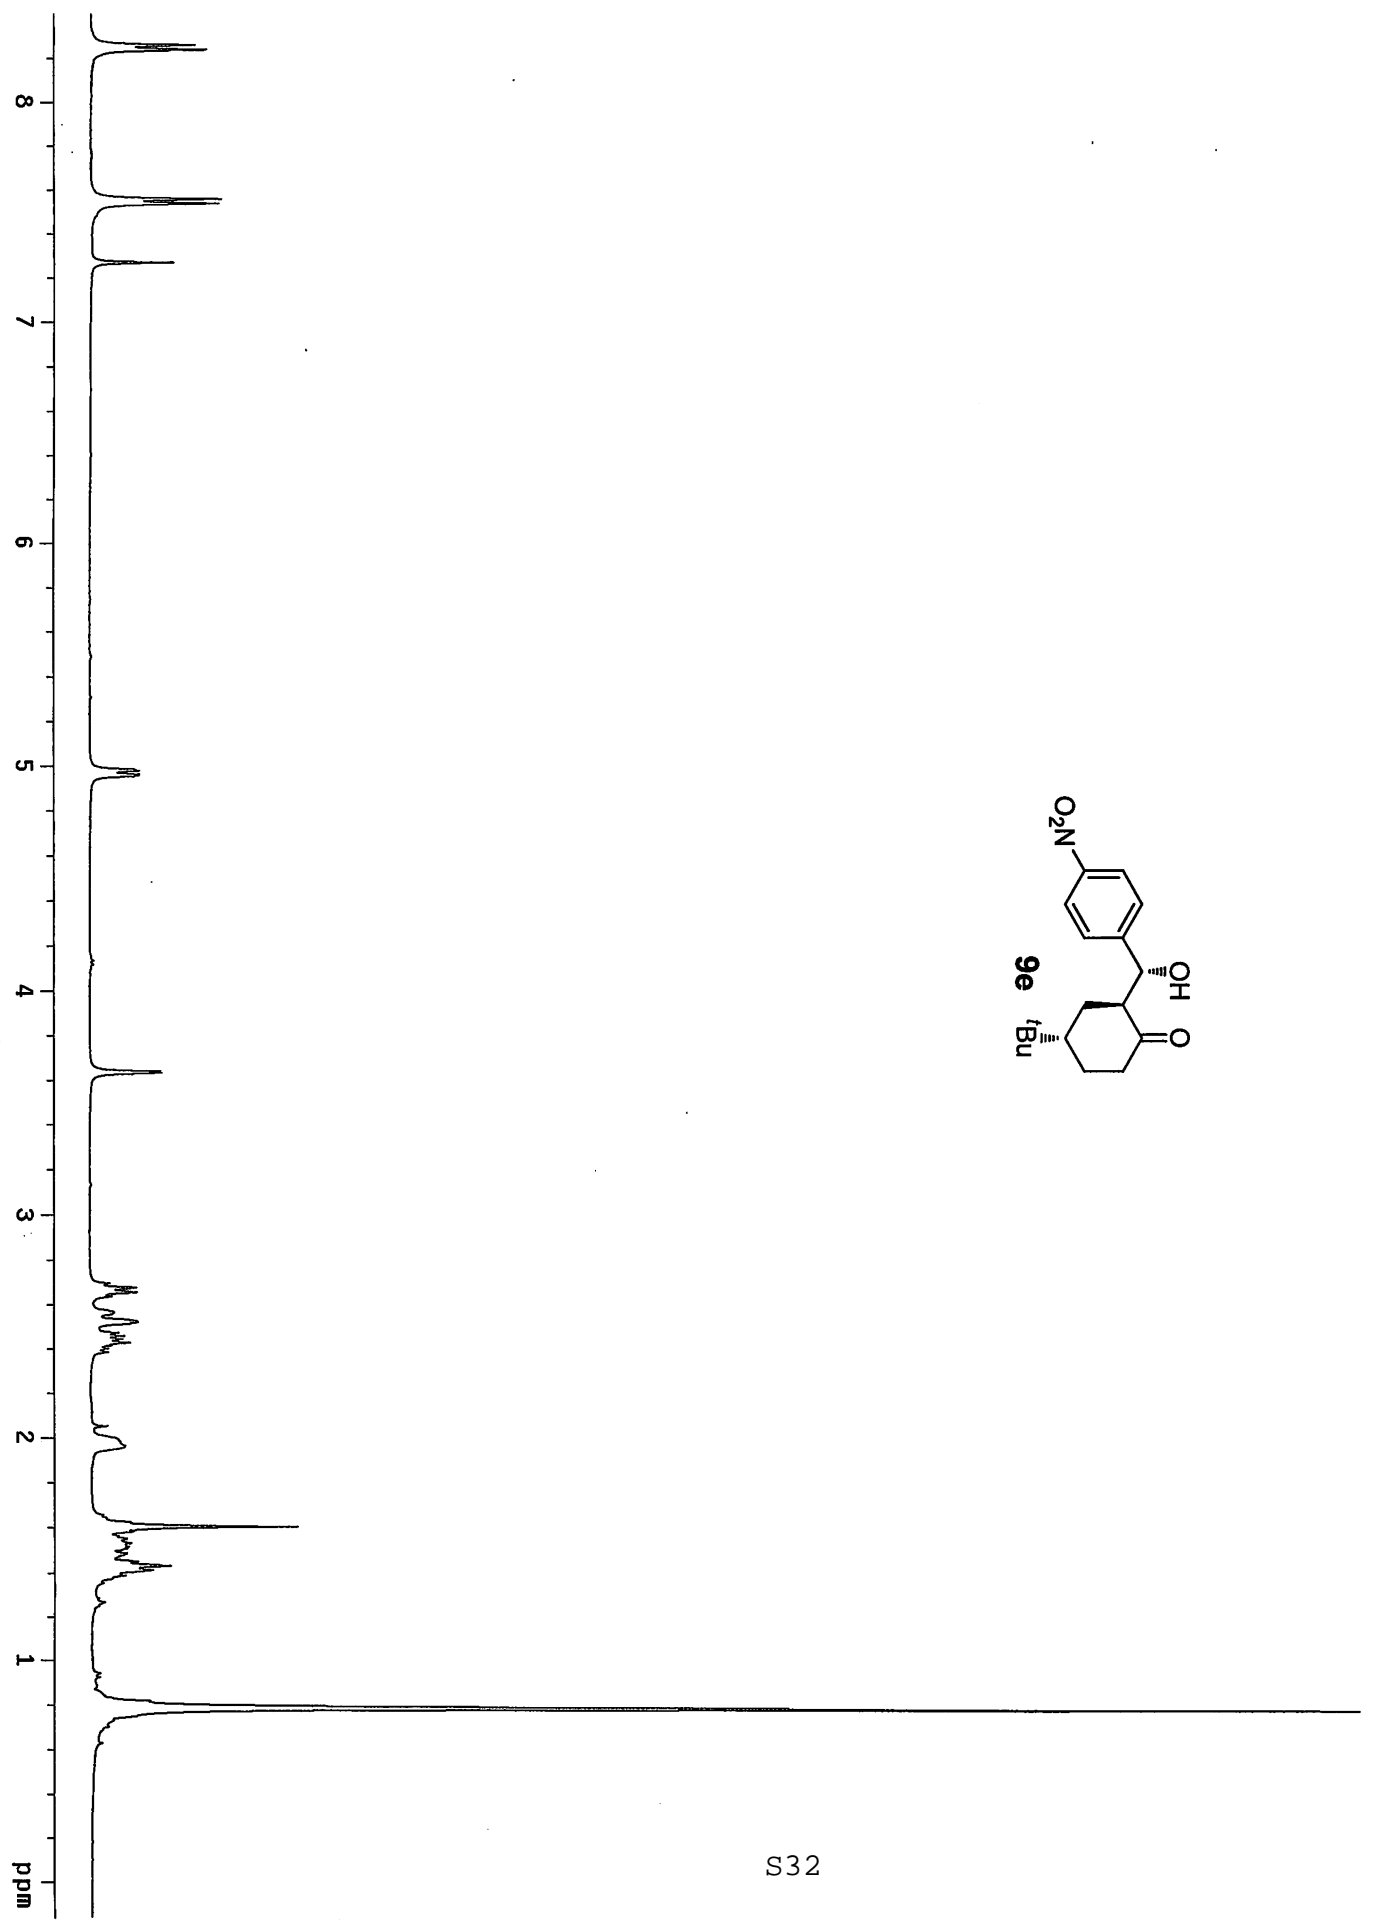



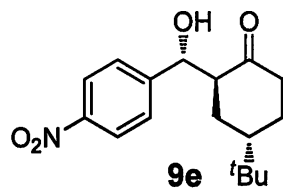

Daicel Chiralpak AD Column  
iPrOH/hexane = 20:80,  $\lambda = 254 \text{ nm}$ , flow rate = 0.5 mL/min.

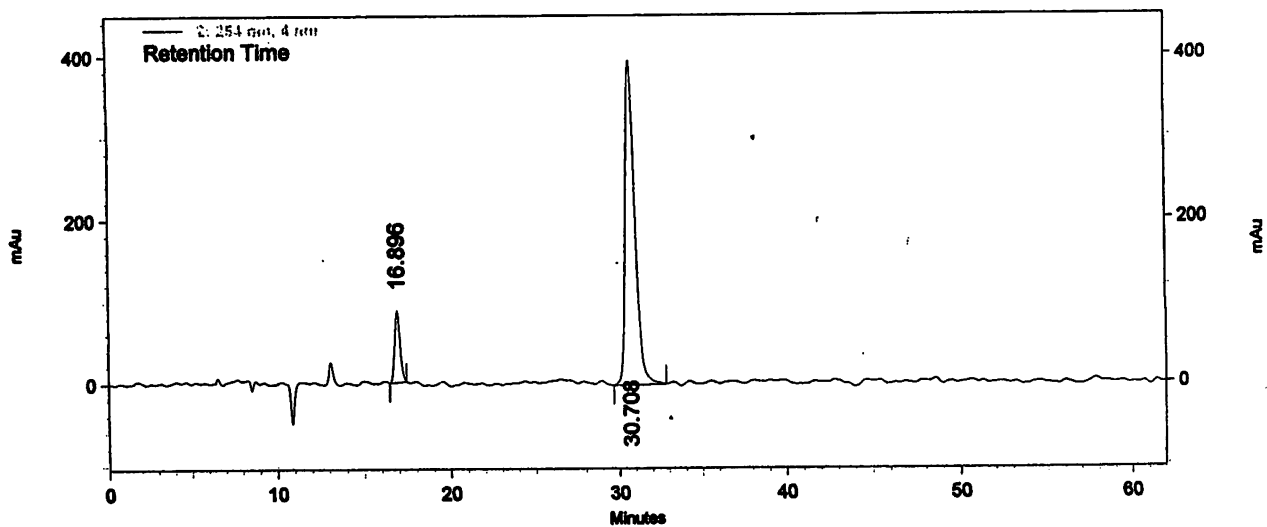

**2: 254 nm, 4 nm Results**

| Retention Time | Area            | Area %        |
|----------------|-----------------|---------------|
| 16.896         | 1905920         | 10.61         |
| 30.708         | 16062137        | 89.39         |
| <b>Totals</b>  | <b>17968057</b> | <b>100.00</b> |

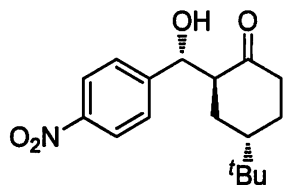

**9e (racemic)**

Daicel Chiralpak AD Column  
 iPrOH/hexane = 20:80,  $\lambda = 254 \text{ nm}$ , flow rate = 0.5 mL/min.

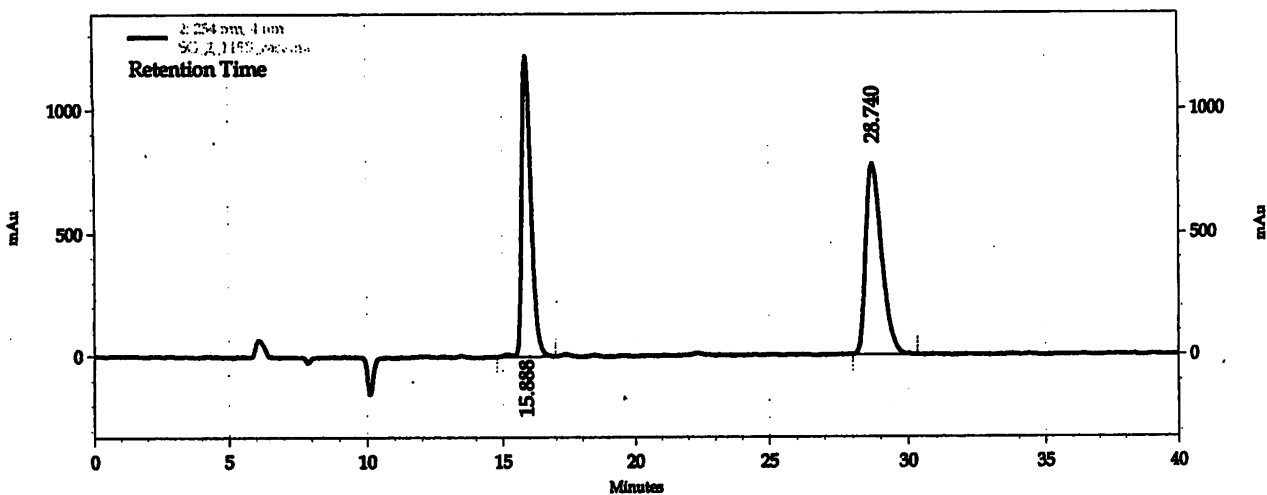

2: 254 nm, 4 nm

Results

| Retention Time | Area            | Area %        | Height         | Height %      |
|----------------|-----------------|---------------|----------------|---------------|
| 15.888         | 29630477        | 49.00         | 1218420        | 61.09         |
| 28.740         | 30833762        | 51.00         | 775981         | 38.91         |
| <b>Totals</b>  | <b>60464239</b> | <b>100.00</b> | <b>1994401</b> | <b>100.00</b> |

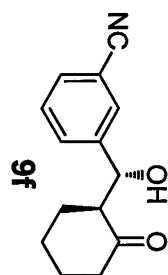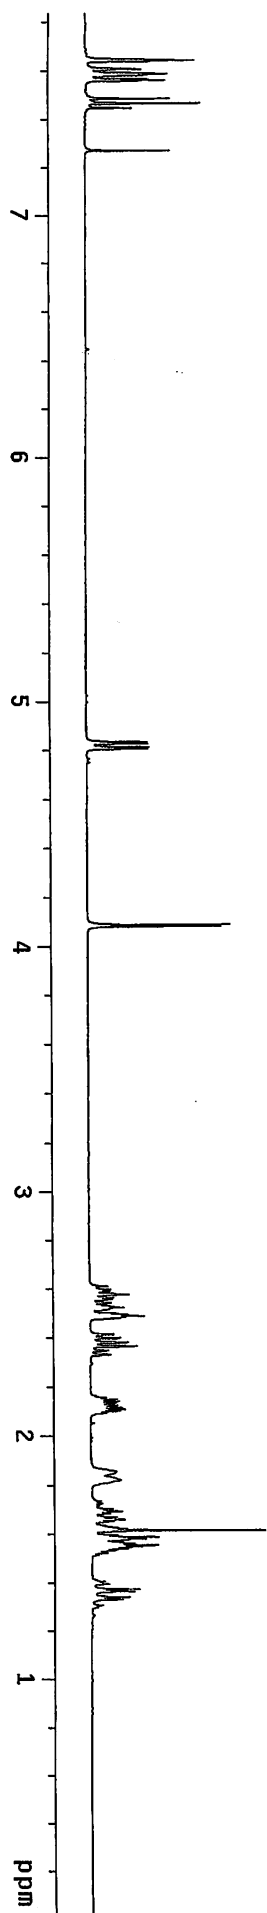

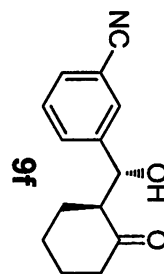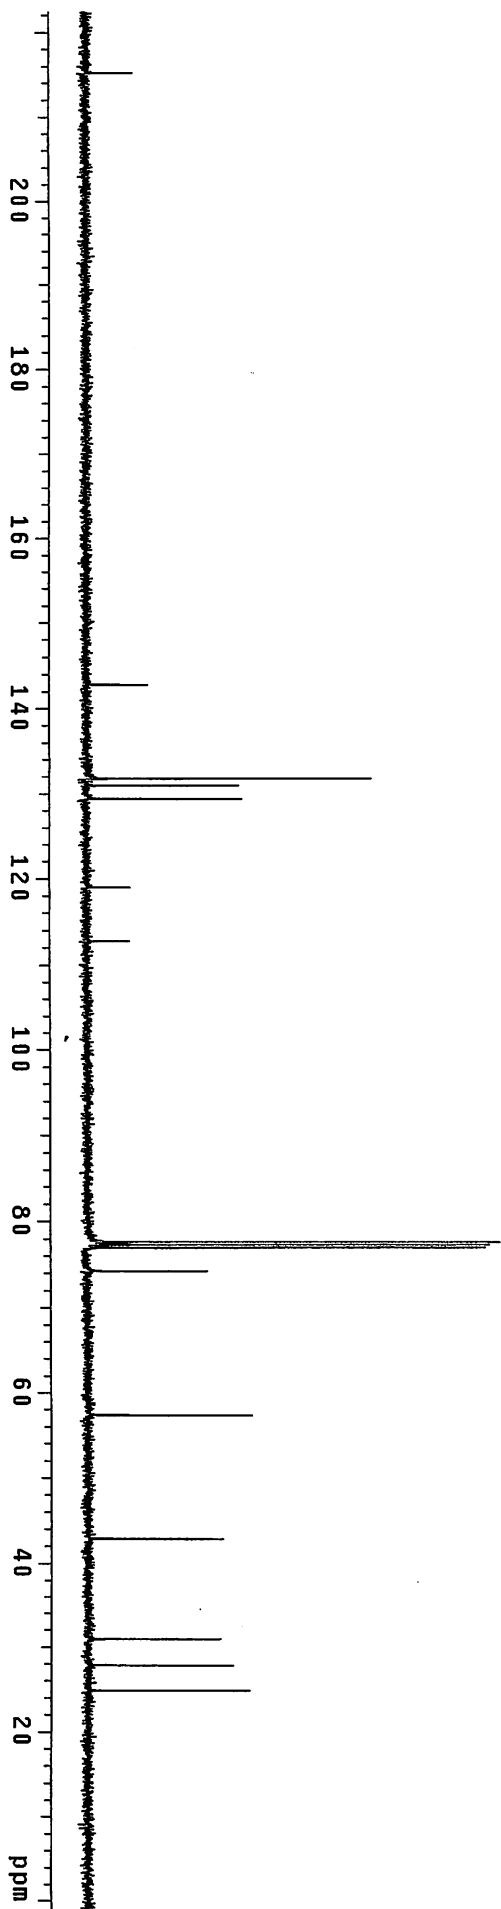

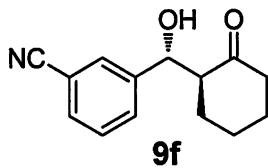

Daicel Chiralpak AD Column  
 iPrOH/hexane = 10:90,  $\lambda = 273 \text{ nm}$ , flow rate = 0.5 mL/min.

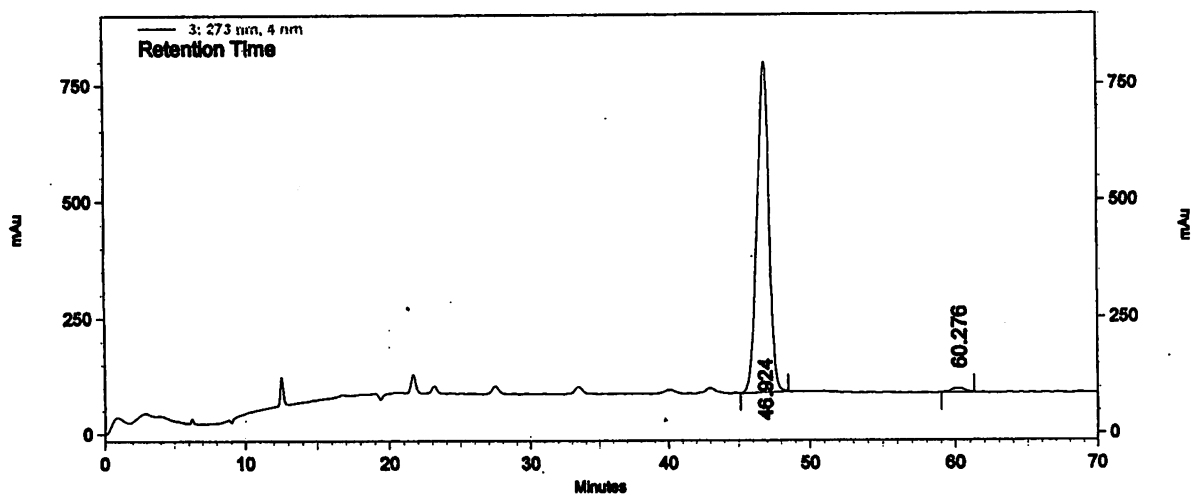

**3: 273 nm, 4 nm Results**

| Retention Time | Area            | Area %        |
|----------------|-----------------|---------------|
| 46.924         | 40893966        | 98.66         |
| 60.276         | 555135          | 1.34          |
| <b>Totals</b>  | <b>41449101</b> | <b>100.00</b> |

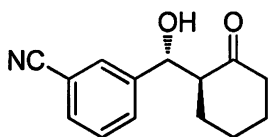

**9f (racemic)**

Daicel Chiralpak AD Column  
 iPrOH/hexane = 10:90,  $\lambda$  = 273 nm, flow rate = 0.5 mL/min.

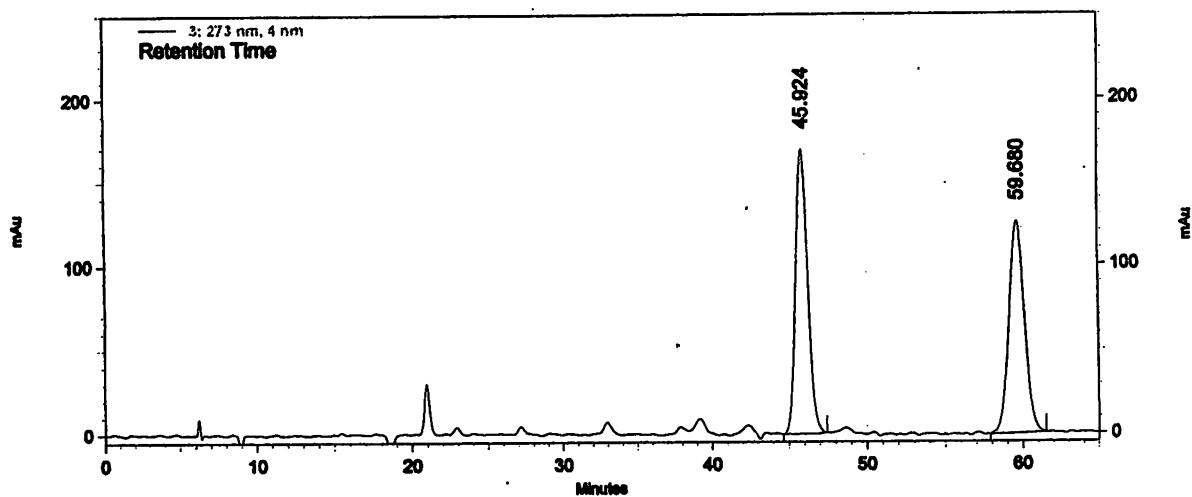

**3: 273 nm, 4 nm Results**

| Retention Time | Area            | Area %        |
|----------------|-----------------|---------------|
| 45.924         | 9138351         | 50.93         |
| 59.680         | 8805542         | 49.07         |
| <b>Totals</b>  | <b>17943893</b> | <b>100.00</b> |

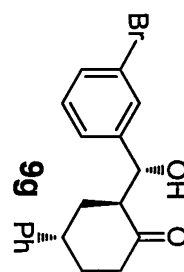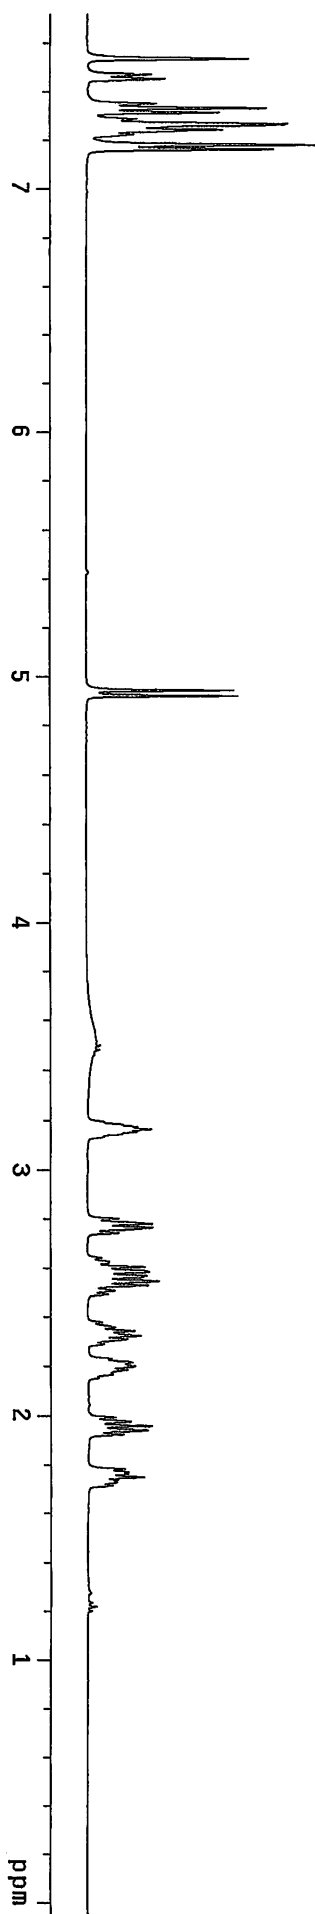

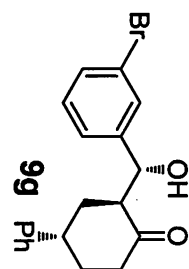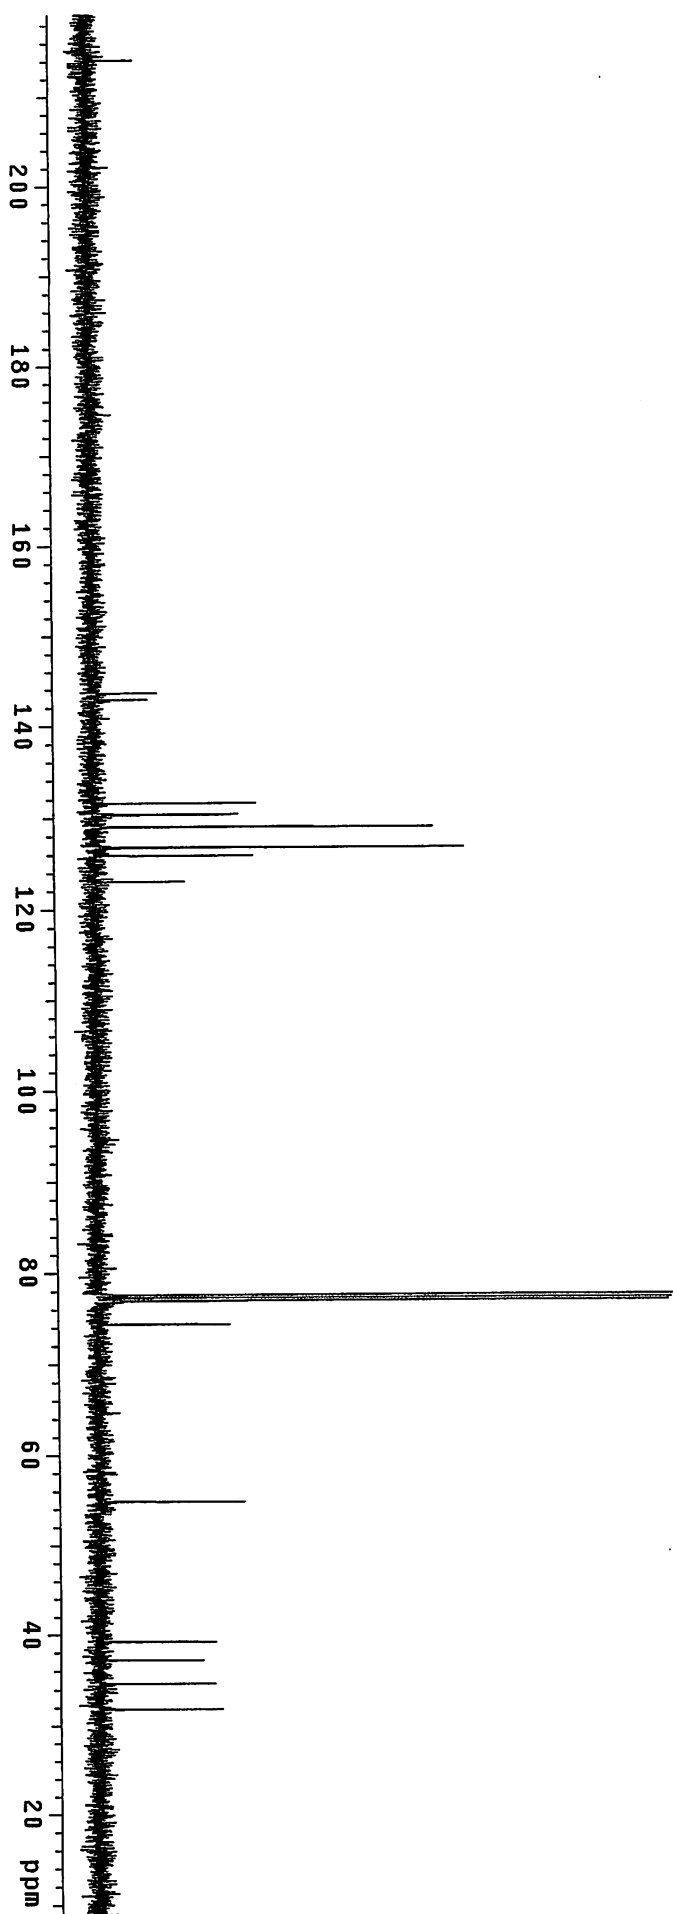



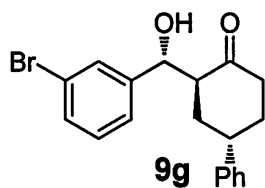

Daicel Chiralpak AD Column  
iPrOH/hexane = 20:80,  $\lambda = 218$  nm, flow rate = 1.0 mL/min.

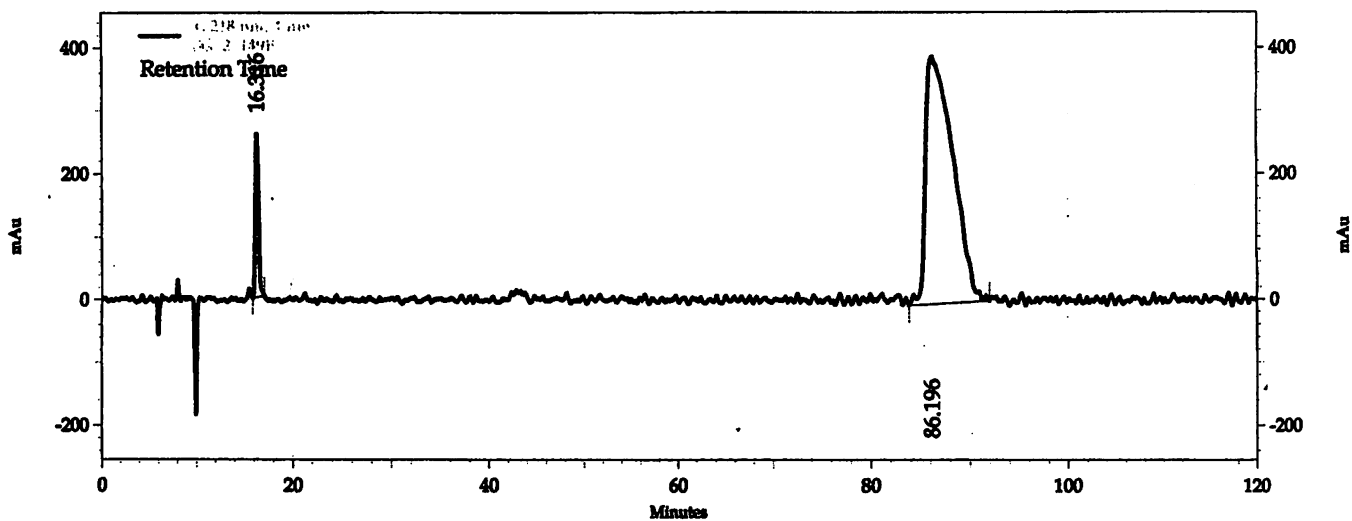

**1: 218 nm, 4 nm**

**Results**

| Retention Time | Area            | Area %        | Height        | Height %      |
|----------------|-----------------|---------------|---------------|---------------|
| 16.316         | 5831736         | 7.21          | 260107        | 39.83         |
| 86.196         | 75052341        | 92.79         | 392871        | 60.17         |
| <b>Totals</b>  | <b>80884077</b> | <b>100.00</b> | <b>652978</b> | <b>100.00</b> |

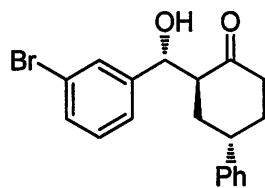

**9g (racemic)**

Daicel Chiralpak AD Column  
 iPrOH/hexane = 20:80,  $\lambda = 218 \text{ nm}$ , flow rate = 1.0 mL/min.

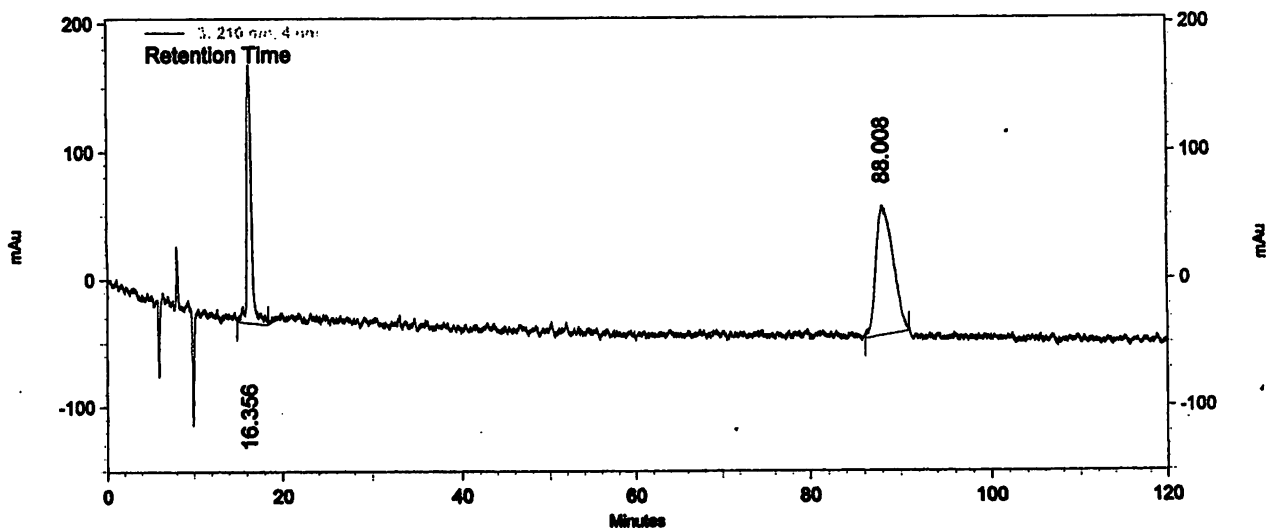

**3: 210 nm, 4 nm Results**

| Retention Time | Area            | Area %        |
|----------------|-----------------|---------------|
| 16.356         | 7378329         | 35.69         |
| 88.008         | 13294555        | 64.31         |
| <b>Totals</b>  | <b>20672884</b> | <b>100.00</b> |

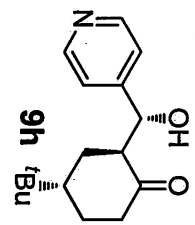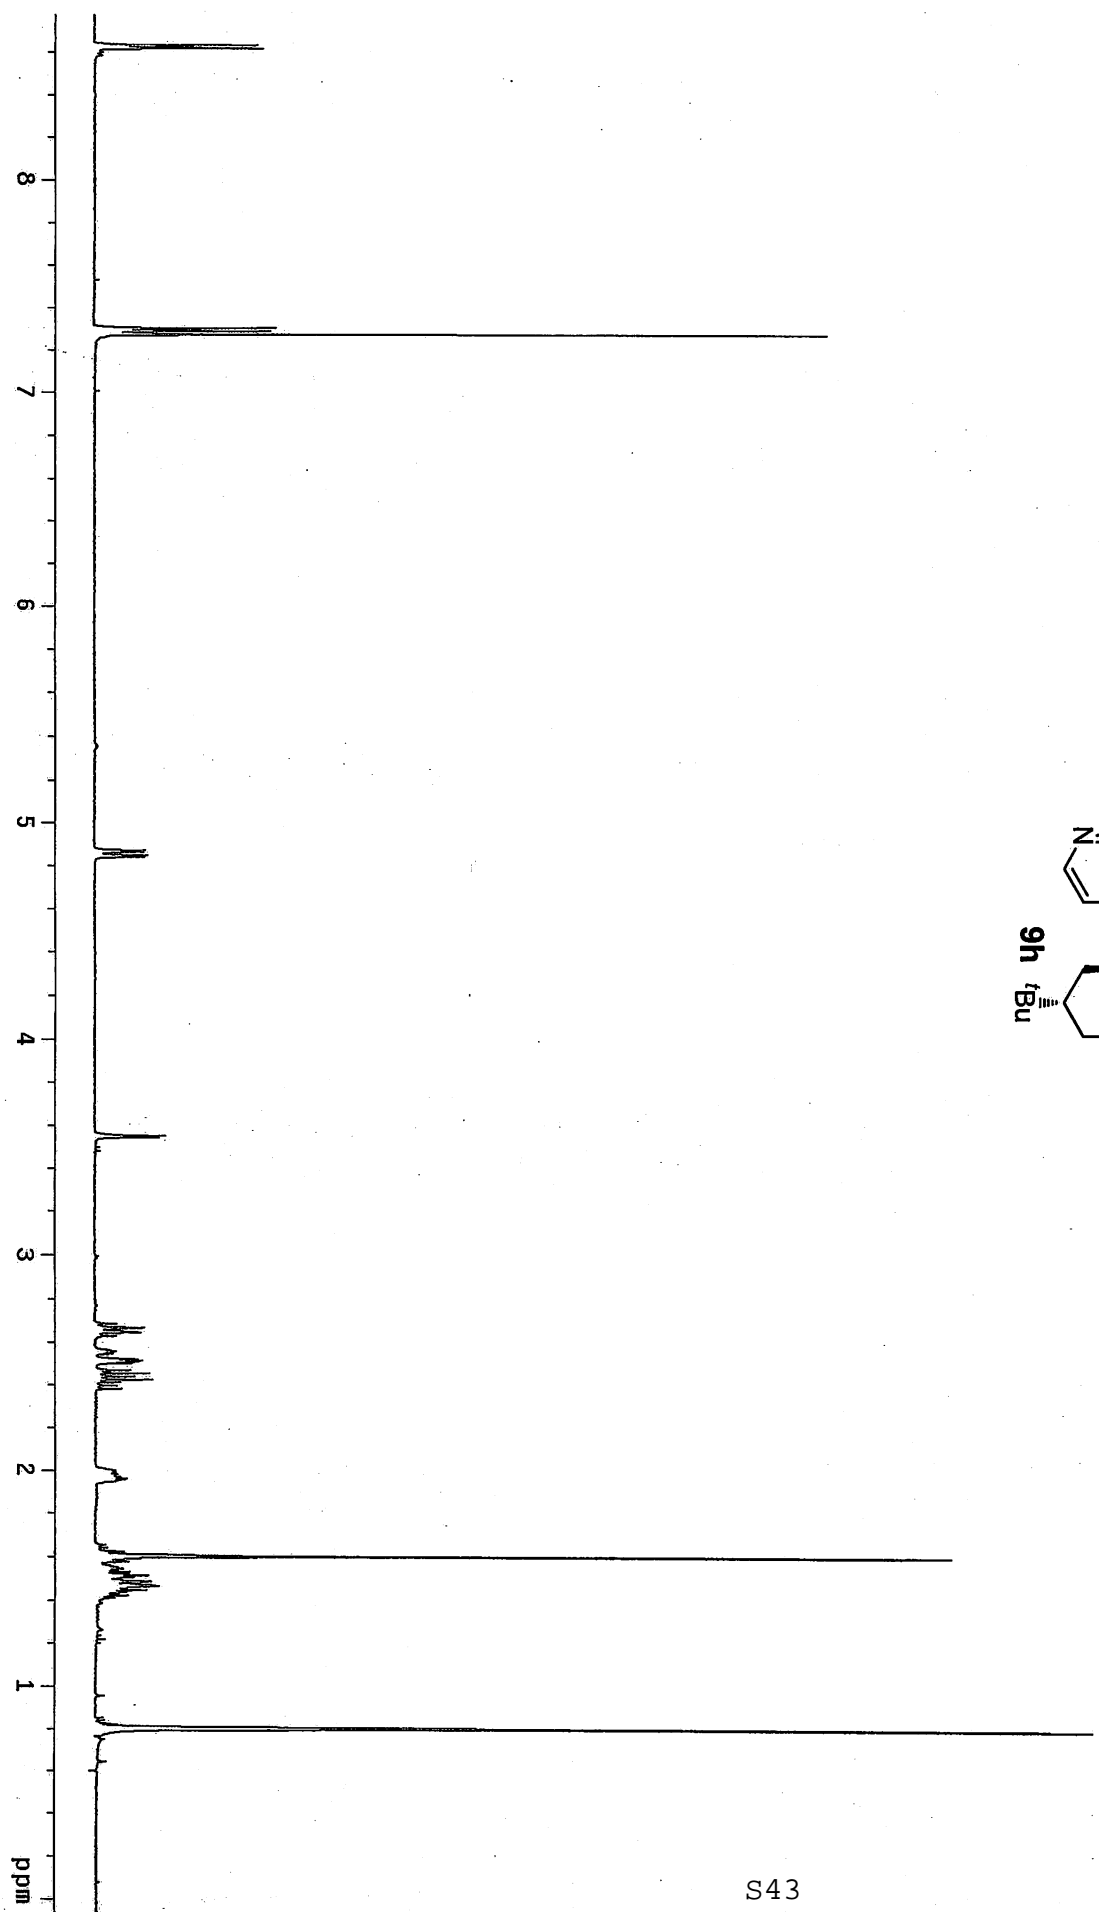

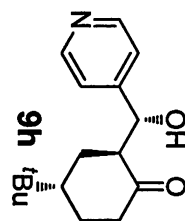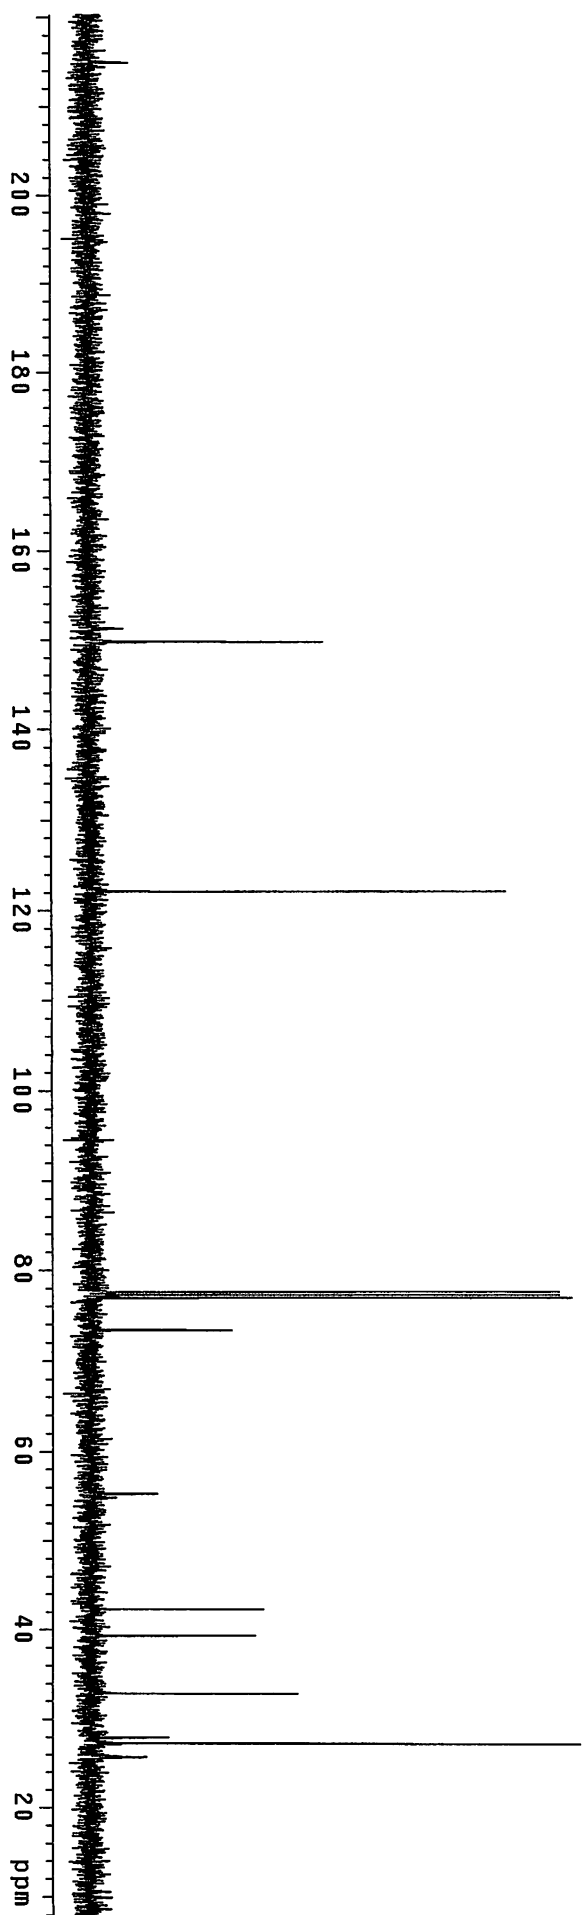

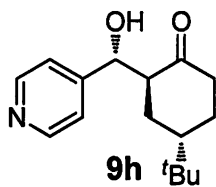

Daicel Chiralpak AD Column  
 iPrOH/hexane = 10:90,  $\lambda$  = 254 nm, flow rate = 1.0 mL/min.

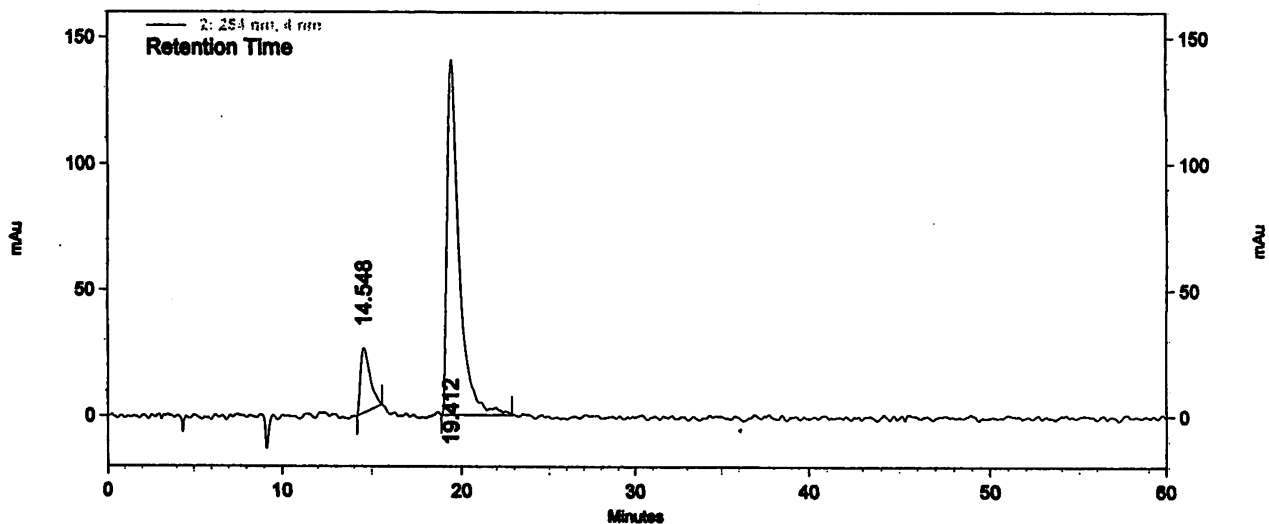

**2: 254 nm, 4 nm Results**

| Retention Time | Area           | Area %        |
|----------------|----------------|---------------|
| 14.548         | 943187         | 12.53         |
| 19.412         | 6582252        | 87.47         |
| <b>Totals</b>  | <b>7525439</b> | <b>100.00</b> |

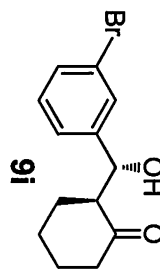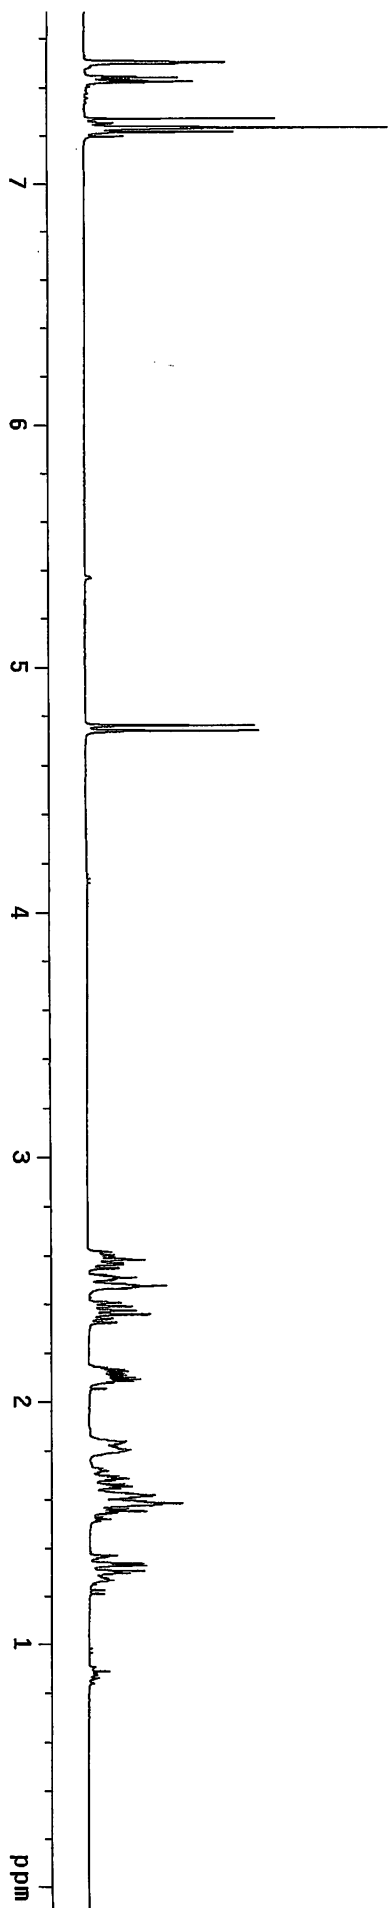

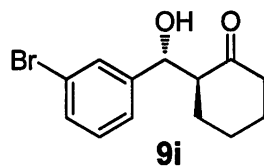

Daicel Chiralpak AD Column  
iPrOH/hexane = 10:90,  $\lambda$  = 254 nm, flow rate = 0.5 mL/min.

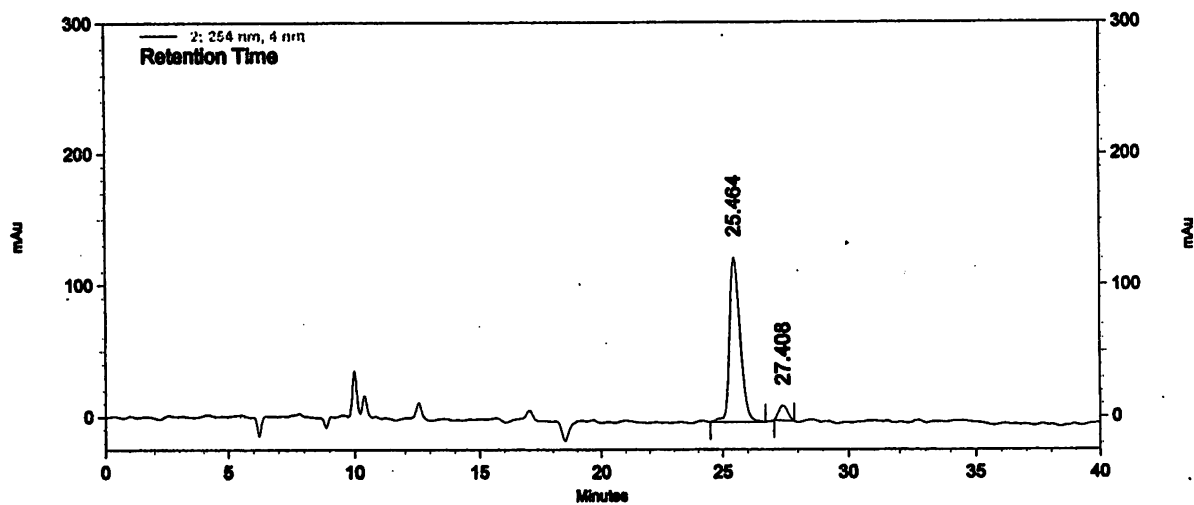

**2: 254 nm, 4 nm Results**

| Retention Time | Area           | Area %        |
|----------------|----------------|---------------|
| 25.464         | 3715377        | 92.92         |
| 27.408         | 282973         | 7.08          |
| <b>Totals</b>  | <b>3998350</b> | <b>100.00</b> |

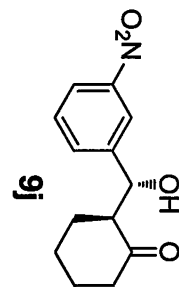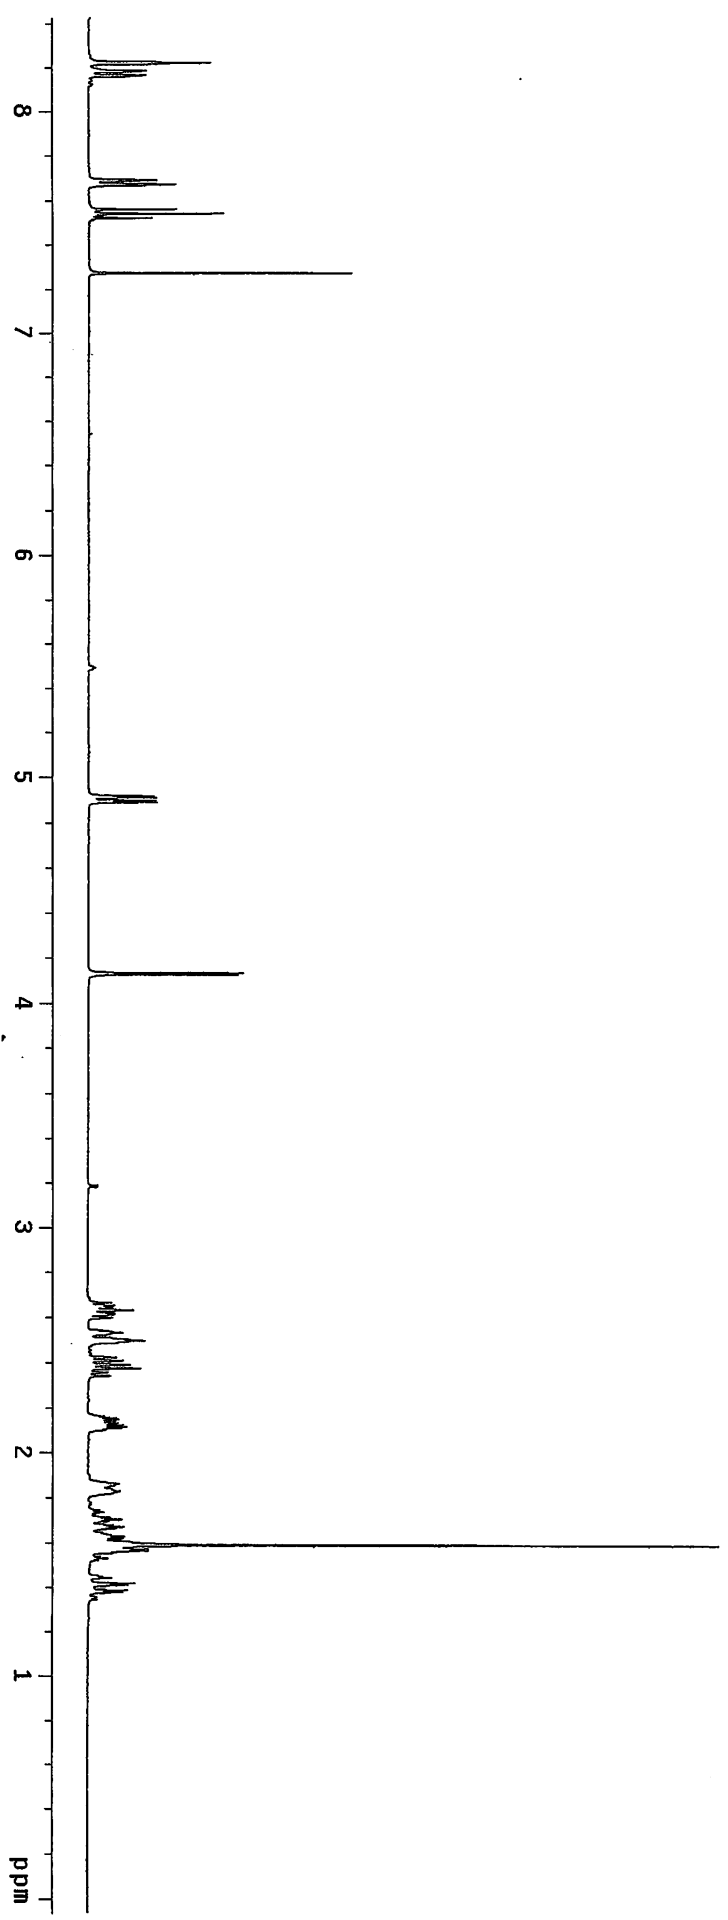



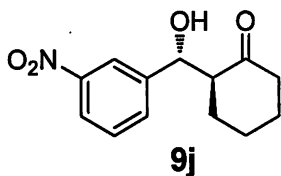

Daicel Chiralpak AD Column  
iPrOH/hexane = 10:90,  $\lambda = 254 \text{ nm}$ , flow rate = 0.5 mL/min.

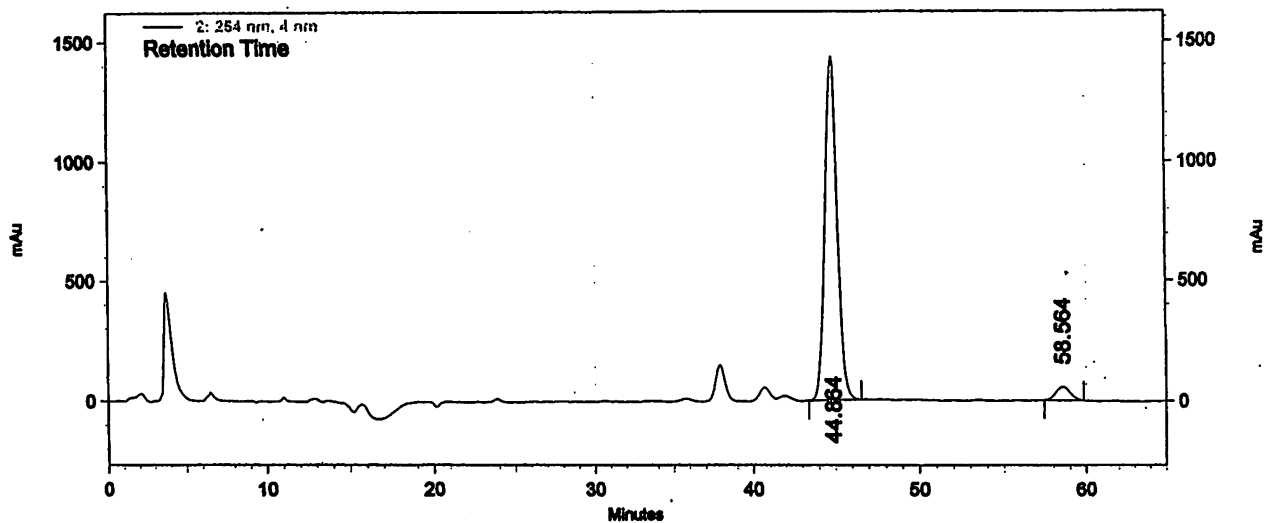

**2: 254 nm, 4 nm Results**

| Retention Time | Area            | Area %        |
|----------------|-----------------|---------------|
| 44.864         | 72903283        | 95.55         |
| 58.564         | 3392696         | 4.45          |
| <b>Totals</b>  | <b>76295979</b> | <b>100.00</b> |
